# Supplementary material for: Diverse inhibitory projections from the cerebellar interposed nucleus
Source: eLife. 2021 Sep 20;10:e66231. doi: 10.7554/eLife.66231 (PMC8483738; doi:10.7554/eLife.66231)
Supplement: Figure 5—source data 1. [file elife-66231-fig5-data1.xlsx]

## Sheet: NTSR1
NTSR45_cellsize1									NTSR45_cellsize2
cell	area	width-box	height- box	major- ellipse	minor- ellipse		uM/ pixels		cell	area	width-box	height- box	major- ellipse	minor- ellipse		uM/ pixels
scale	26	13	2	14.669	2.257		1.15385		scale	26	13	2	14.669	2.257		1.15385
1	116	11	15	15.784	9.357		1.15385		1	225	21	22	23.295	12.298		1.15385
2	116	13	13	14.743	10.018		1.15385		2	242	27	12	26.686	11.546		1.15385
3	277	17	25	26.01	13.56		1.15385		3	274	38	15	32.594	10.703		1.15385
4	117	11	16	14.955	9.961		1.15385		4	176	19	12	19.473	11.508		1.15385
5	169	15	16	15.511	13.873		1.15385		5	194	17	16	18.549	13.316		1.15385
6	213	14	23	21.445	12.646		1.15385		6	196	22	12	21.727	11.486		1.15385
7	122	13	13	12.568	12.359		1.15385		7	275	29	19	24.258	14.434		1.15385
8	223	26	23	29.371	9.667		1.15385		8	259	23	18	21.765	15.151		1.15385
9	186	21	13	21.873	10.827		1.15385		9	256	17	20	19.966	16.325		1.15385
10	154	18	11	17.647	11.111		1.15385		10	191	18	17	20.403	11.919		1.15385
11	138	14	14	15.681	11.205		1.15385		11	167	18	12	18.389	11.563		1.15385
12	163	18	13	17.541	11.832		1.15385
13	354	28	23	21.61	20.858		1.15385
14	243	21	16	19.469	15.892		1.15385
15	216	25	13	22.959	11.979		1.15385
16	300	21	23	25.707	14.859		1.15385
17	316	20	24	21.693	18.547		1.15385
uM									uM
1	133.846	12.6923	17.3077	18.2123	10.7965				1	259.615	24.2308	25.3846	26.8788	14.19
2	133.846	15	15	17.0112	11.5592				2	279.231	31.1538	13.8462	30.7915	13.3223
3	319.615	19.6154	28.8461	30.0115	15.6462				3	316.154	43.8461	17.3077	37.6085	12.3496
4	135	12.6923	18.4615	17.2558	11.4935				4	203.077	21.9231	13.8462	22.4688	13.2785
5	195	17.3077	18.4615	17.8973	16.0073				5	223.846	19.6154	18.4615	21.4027	15.3646
6	245.769	16.1538	26.5385	24.7442	14.5915				6	226.154	25.3846	13.8462	25.0696	13.2531
7	140.769	15	15	14.5015	14.2604				7	317.308	33.4615	21.9231	27.99	16.6546
8	257.308	30	26.5385	33.8896	11.1542				8	298.846	26.5385	20.7692	25.1135	17.4819
9	214.615	24.2308	15	25.2381	12.4927				9	295.385	19.6154	23.0769	23.0377	18.8365
10	177.692	20.7692	12.6923	20.3619	12.8204				10	220.385	20.7692	19.6154	23.5419	13.7527
11	159.231	16.1538	16.1538	18.0935	12.9288				11	192.692	20.7692	13.8462	21.2181	13.3419
12	188.077	20.7692	15	20.2396	13.6523
13	408.461	32.3077	26.5385	24.9346	24.0669
14	280.385	24.2308	18.4615	22.4642	18.3369
15	249.231	28.8461	15	26.4912	13.8219
16	346.154	24.2308	26.5385	29.6619	17.145
17	364.615	23.0769	27.6923	25.0304	21.4004
NTSR_Rear_enj121019										NTSR_Rear_enj121019_cellsize2							NTSR_Rear_enj121019_cellsize3
cell	area	width-box	height- box	major- ellipse	minor- ellipse		uM/ pixels			cell	area	width-box	height- box	major- ellipse	minor- ellipse		cell	area	width-box	height- box	major- ellipse	minor- ellipse
scale	28	14	2	15.797	2.257		1.07143			1	26	13	2	14.669	2.257		1	26	13	2	14.669	2.257
1	177	15	16	17.435	12.926		1.07143			2	222	18	26	26.452	10.686		2	336	26	24	29.199	14.652
2	158	13	17	16.007	12.568		1.07143			3	235	18	20	21.989	13.607		3	207	19	16	20.807	12.667
3	186	15	17	17.418	13.596		1.07143			4	352	31	25	24.666	18.17		4	173	17	17	17.546	12.554
4	191	20	14	18.974	12.817		1.07143			5	264	23	21	21.058	15.962		5	224	18	18	19.384	14.713
5	172	20	12	19.823	11.048		1.07143			6	286	32	20	24.871	14.642		6	333	29	21	24.647	17.202
6	171	17	18	20.725	10.506		1.07143			7	186	15	19	17.301	13.689
7	200	18	15	18.526	13.745		1.07143			8	228	18	18	18.761	15.474
8	221	17	21	19.429	14.483		1.07143			9	223	22	21	19.241	14.756
9	181	19	15	16.993	13.562		1.07143			10	289	17	24	23.93	15.377
10	337	21	26	23.368	18.362		1.07143			11	254	21	20	19.741	16.382
11	225	19	19	18.279	15.673		1.07143			12	141	21	21	25.107	7.15
12	305	20	32	25.432	15.269		1.07143			13	219	20	17	18.823	14.814
13	227	19	19	20.254	14.27		1.07143			14	183	16	16	16.595	14.041
14	155	14	17	18.111	10.897		1.07143			15	161	15	15	16.516	12.412
										16	115	12	14	13.983	10.471
uM										17	216	19	18	17.434	15.775
1	189.643	16.0714	17.1429	18.6804	13.8493					18	161	18	14	17.575	11.664
2	169.286	13.9286	18.2143	17.1504	13.4657												2	387.692	30	27.6923	33.6912	16.9062
3	199.286	16.0714	18.2143	18.6621	14.5671					2	256.154	20.7692	30	30.5215	12.33		3	238.846	21.9231	18.4615	24.0081	14.6158
4	204.643	21.4286	15	20.3293	13.7325					3	271.154	20.7692	23.0769	25.3719	15.7004		4	199.615	19.6154	19.6154	20.2454	14.4854
5	184.286	21.4286	12.8571	21.2389	11.8371					4	406.154	35.7692	28.8462	28.4608	20.9654		5	258.462	20.7692	20.7692	22.3662	16.9765
6	183.214	18.2143	19.2857	22.2054	11.2564					5	304.615	26.5385	24.2308	24.2977	18.4177		6	384.231	33.4615	24.2308	28.4388	19.8485
7	214.286	19.2857	16.0714	19.8493	14.7268					6	330	36.9231	23.0769	28.6973	16.8946
8	236.786	18.2143	22.5	20.8168	15.5175					7	214.615	17.3077	21.9231	19.9627	15.795
9	193.929	20.3571	16.0714	18.2068	14.5307					8	263.077	20.7692	20.7692	21.6473	17.8546
10	361.071	22.5	27.8571	25.0371	19.6736					9	257.308	25.3846	24.2308	22.2012	17.0262
11	241.071	20.3571	20.3571	19.5846	16.7925					10	333.462	19.6154	27.6923	27.6115	17.7427
12	326.786	21.4286	34.2857	27.2486	16.3596					11	293.077	24.2308	23.0769	22.7781	18.9023
13	243.214	20.3571	20.3571	21.7007	15.2893					12	162.692	24.2308	24.2308	28.9696	8.25
14	166.071	15	18.2143	19.4046	11.6754					13	252.692	23.0769	19.6154	21.7188	17.0931
										14	211.154	18.4615	18.4615	19.1481	16.2012
										15	185.769	17.3077	17.3077	19.0569	14.3215
										16	132.692	13.8462	16.1538	16.1342	12.0819
										17	249.231	21.9231	20.7692	20.1162	18.2019
										18	185.769	20.7692	16.1538	20.2788	13.4585
NTSR1_346_cellsize1								NTSR1_346_cellsize2								NTSR1_346_cellsize3								NTSR1_346_cellsize3
cell	area	width-box	height- box	major- ellipse	minor- ellipse			cell	area	width-box	height- box	major- ellipse	minor- ellipse			cell	area	width-box	height- box	major- ellipse	minor- ellipse			cell	area	width-box	height- box	major- ellipse	minor- ellipse
1	26	13	2	14.669	2.257			1	26	13	2	14.669	2.257			1	26	13	2	14.669	2.257			1	26	13	2	14.669	2.257
2	262	23	20	21.976	15.18			2	147	13	15	14.247	13.137			2	267	17	22	22.23	15.292			2	221	17	19	21.508	13.083
3	242	24	16	23.299	13.225			3	286	20	22	20.033	18.178			3	186	19	16	16.784	14.11			3	210	18	18	17.772	15.045
4	224	21	16	19.358	14.733			4	183	16	18	16.859	13.82			4	208	20	15	21.187	12.5			4	333	18	36	28.098	15.089
5	196	24	13	21.869	11.411			5	185	15	19	19.431	12.123			5	248	17	23	23.087	13.677			5	304	29	25	28.842	13.42
6	217	20	17	18.086	15.276			6	189	19	17	16.365	14.705			6	201	14	21	19.351	13.225			6	229	16	19	19.067	15.292
7	175	21	12	20.151	11.057			7	270	19	23	21.869	15.72			7	303	22	30	29.442	13.103			7	144	11	19	18.521	9.899
8	186	26	13	24.637	9.613			8	229	19	17	20.609	14.147			8	152	13	15	16.142	11.99			8	179	16	20	17.746	12.843
9	211	28	13	24.405	11.008			9	220	19	17	18.524	15.121			9	121	11	14	14.822	10.394
10	198	19	17	17.438	14.457			10	204	16	20	17.39	14.936			10	201	14	21	19.351	13.225
11	240	19	18	20.291	15.06			11	192	14	19	20.353	12.011			11	111	13	12	15.064	9.382
12	159	15	16	17.055	11.87			12	175	14	19	19.073	11.682			12	95	14	10	12.482	9.69
13	224	19	24	24.318	11.728			13	220	14	22	21.311	13.144			13	142	20	10	19.426	9.307
14	103	10	16	13.817	9.491			14	205	16	23	20.757	12.575			14	99	14	9	13.688	9.209
15	142	13	18	17.263	10.473			15	179	15	19	17.057	13.362
16	140	15	14	13.843	12.877			16	180	20	15	17.383	13.184
17	126	14	15	13.272	12.087			17	158	14	16	16.598	12.121
								18	172	17	15	16.734	13.087
2	302.308	26.5385	23.0769	25.3569	17.5154			2	169.615	15	17.3077	16.4388	15.1581			1	308.077	19.6154	25.3846	25.65	17.6446			2	255	19.6154	21.9231	24.8169	15.0958
3	279.231	27.6923	18.4615	26.8835	15.2596			3	330	23.0769	25.3846	23.115	20.9746			2	214.615	21.9231	18.4615	19.3662	16.2808			3	242.308	20.7692	20.7692	20.5062	17.3596
4	258.462	24.2308	18.4615	22.3362	16.9996			4	211.154	18.4615	20.7692	19.4527	15.9462			3	240	23.0769	17.3077	24.4465	14.4231			4	384.231	20.7692	41.5385	32.4208	17.4104
5	226.154	27.6923	15	25.2335	13.1665			5	213.462	17.3077	21.9231	22.4204	13.9881			4	286.154	19.6154	26.5385	26.6388	15.7812			5	350.769	33.4615	28.8462	33.2792	15.4846
6	250.385	23.0769	19.6154	20.8685	17.6262			6	218.077	21.9231	19.6154	18.8827	16.9673			5	231.923	16.1538	24.2308	22.3281	15.2596			6	264.231	18.4615	21.9231	22.0004	17.6446
7	201.923	24.2308	13.8462	23.2512	12.7581			7	311.538	21.9231	26.5385	25.2335	18.1385			6	349.615	25.3846	34.6154	33.9715	15.1188			7	166.154	12.6923	21.9231	21.3704	11.4219
8	214.615	30	15	28.4273	11.0919			8	264.231	21.9231	19.6154	23.7796	16.3235			7	175.385	15	17.3077	18.6254	13.8346			8	206.538	18.4615	23.0769	20.4762	14.8188
9	243.462	32.3077	15	28.1596	12.7015			9	253.846	21.9231	19.6154	21.3738	17.4473			8	139.615	12.6923	16.1538	17.1023	11.9931
10	228.462	21.9231	19.6154	20.1208	16.6812			10	235.385	18.4615	23.0769	20.0654	17.2338			9	231.923	16.1538	24.2308	22.3281	15.2596
11	276.923	21.9231	20.7692	23.4127	17.3769			11	221.538	16.1538	21.9231	23.4842	13.8588			10	128.077	15	13.8462	17.3815	10.8254
12	183.462	17.3077	18.4615	19.6788	13.6962			12	201.923	16.1538	21.9231	22.0073	13.4792			11	109.615	16.1538	11.5385	14.4023	11.1808
13	258.462	21.9231	27.6923	28.0592	13.5323			13	253.846	16.1538	25.3846	24.5896	15.1662			12	163.846	23.0769	11.5385	22.4146	10.7388
14	118.846	11.5385	18.4615	15.9427	10.9512			14	236.538	18.4615	26.5385	23.9504	14.5096			13	114.231	16.1538	10.3846	15.7938	10.6258
15	163.846	15	20.7692	19.9188	12.0842			15	206.538	17.3077	21.9231	19.6812	15.4177
16	161.538	17.3077	16.1538	15.9727	14.8581			16	207.692	23.0769	17.3077	20.0573	15.2123
17	145.385	16.1538	17.3077	15.3138	13.9465			17	182.308	16.1538	18.4615	19.1515	13.9858
								18	198.462	19.6154	17.3077	19.3085	15.1004
NTSR347_cellsize1								NTSR347_cellsize2																NTSR347_cellsize3
cell	area	width-box	height- box	major- ellipse	minor- ellipse			cell	area	width-box	height- box	major- ellipse	minor- ellipse				area	width-box	height- box	major- ellipse	minor- ellipse			cell	area	width-box	height- box	major- ellipse	minor- ellipse
1	26	13	2	14.669	2.257			1	26	13	2	14.669	2.257				26	13	2	14.669	2.257			1	26	13	2	14.669	2.257
2	136	16	13	14.811	11.691			2	266	26	24	23.533	14.392			2	262	28	18	22.562	14.786			2	314	23	30	26.089	15.324
3	310	21	30	22.649	17.427			3	237	23	20	18.19	16.589			3	214	16	21	18.853	14.453			3	189	13	26	22.328	10.778
4	208	23	12	22.954	11.538			4	215	21	23	20.7	13.224			4	200	13	26	21.149	12.041			4	330	33	31	30.224	13.902
5	223	25	18	18.828	15.08			5	175	14	19	19.556	11.394			5	174	16	18	17.484	12.672			5	309	19	25	25.572	15.386
6	146	13	16	15.476	12.011			6	215	20	18	21.056	13.001			6	262	20	20	20.054	16.634			6	293	22	29	24.338	15.328
7	173	30	15	20.328	10.836			7	175	23	12	21.039	10.59			7	146	15	16	14.772	12.585			7	183	16	17	17.276	13.487
8	188	21	18	17.23	13.893			8	180	18	19	17.482	13.11			8	191	14	20	19.192	12.672			8	301	21	25	25.768	14.873
								9	136	13	15	14.524	11.923			9	177	13	23	20.125	11.198			9	138	14	16	15.855	11.082
								10	108	13	14	12.613	10.902			10	155	13	19	17.254	11.438			10	171	14	23	18.813	11.573
								11	194	19	22	22.242	11.105			11	194	17	16	16.637	14.847			11	117	15	12	15.214	9.792
								12	117	13	15	15.016	9.92			12	116	15	12	14.891	9.918			12	108	17	13	19.734	6.968
																13	235	20	20	18.474	16.196
																14	320	17	33	29.125	13.989
																15	293	22	19	21.75	17.152
2	156.923	18.4615	15	17.0896	13.4896			2	306.923	30	27.6923	27.1535	16.6062				302.308	32.3077	20.7692	26.0331	17.0608			2	362.308	26.5385	34.6154	30.1027	17.6815
3	357.692	24.2308	34.6154	26.1335	20.1081			3	273.462	26.5385	23.0769	20.9885	19.1412				246.923	18.4615	24.2308	21.7535	16.6765			3	218.077	15	30	25.7631	12.4362
4	240	26.5385	13.8462	26.4854	13.3131			4	248.077	24.2308	26.5385	23.8846	15.2585				230.769	15	30	24.4027	13.8935			4	380.769	38.0769	35.7692	34.8738	16.0408
5	257.308	28.8462	20.7692	21.7246	17.4			5	201.923	16.1538	21.9231	22.5646	13.1469				200.769	18.4615	20.7692	20.1738	14.6215			5	356.538	21.9231	28.8462	29.5062	17.7531
6	168.462	15	18.4615	17.8569	13.8588			6	248.077	23.0769	20.7692	24.2954	15.0012				302.308	23.0769	23.0769	23.1392	19.1931			6	338.077	25.3846	33.4615	28.0823	17.6862
7	199.615	34.6154	17.3077	23.4554	12.5031			7	201.923	26.5385	13.8462	24.2758	12.2192				168.462	17.3077	18.4615	17.0446	14.5212			7	211.154	18.4615	19.6154	19.9338	15.5619
8	216.923	24.2308	20.7692	19.8808	16.0304			8	207.692	20.7692	21.9231	20.1715	15.1269				220.385	16.1538	23.0769	22.1446	14.6215			8	347.308	24.2308	28.8462	29.7323	17.1612
								9	156.923	15	17.3077	16.7585	13.7573				204.231	15	26.5385	23.2212	12.9208			9	159.231	16.1538	18.4615	18.2942	12.7869
								10	124.615	15	16.1538	14.5535	12.5792				178.846	15	21.9231	19.9085	13.1977			10	197.308	16.1538	26.5385	21.7073	13.3535
								11	223.846	21.9231	25.3846	25.6638	12.8135				223.846	19.6154	18.4615	19.1965	17.1312			11	135	17.3077	13.8462	17.5546	11.2985
								12	135	15	17.3077	17.3262	11.4462				133.846	17.3077	13.8462	17.1819	11.4438			12	124.615	19.6154	15	22.77	8.04
																	271.154	23.0769	23.0769	21.3162	18.6877
																	369.231	19.6154	38.0769	33.6058	16.1412
																	338.077	25.3846	21.9231	25.0962	19.7908
Ntsr1_352_cellsize1							Ntsr1_352_cellsize2							Ntsr1_352_cellsize3							Ntsr1_352_cellsize4
cell	area	width-box	height- box	major- ellipse	minor- ellipse		cell	area	width-box	height- box	major- ellipse	minor- ellipse		cell	area	width-box	height- box	major- ellipse	minor- ellipse		cell	area	width-box	height- box	major- ellipse	minor- ellipse
1	65	13	5	14.669	5.642		1	65	13	5	14.669	5.642		1	65	13	5	14.669	5.642		1	65	13	5	14.669	5.642
2	62	11	9	12.545	6.293		2	107	12	12	13.148	10.362		2	260	18	25	23.609	14.022		2	188	15	18	18.059	13.255
3	94	10	15	13.433	8.91		3	228	13	25	22.563	12.866		3	148	13	16	14.997	12.565		3	254	22	16	21.851	14.8
4	115	9	17	17.091	8.567		4	108	12	12	12.892	10.666		4	287	22	23	20.899	17.485		4	220	17	20	18.943	14.787
5	155	26	10	23.966	8.235		5	102	9	14	14.536	8.934		5	150	12	18	18.298	10.437		5	194	16	19	17.895	13.803
6	69	9	10	10.026	8.763		6	122	10	15	15.357	10.115		6	165	15	15	16.901	12.43		6	130	15	13	15.818	10.464
7	96	11	11	12.009	10.179		7	161	14	16	15.787	12.985		7	93	10	13	12.115	9.774		7	114	11	16	14.551	9.976
8	106	12	11	12.708	10.62		8	147	12	15	15.2	12.313		8	156	15	15	14.427	13.768		8	97	14	9	13.867	8.906
9	134	12	18	17.228	9.903		9	103	12	12	13.825	9.486		9	223	18	19	22.169	12.808		9	140	13	15	15.986	11.151
10	105	9	14	14.281	9.361		10	168	14	15	15.93	13.428		10	156	17	13	15.753	12.609		10	108	12	11	12.676	10.848
11	135	12	15	14.576	11.793		11	125	11	15	14.831	10.731		11	187	14	20	21.776	10.934		11	122	13	13	14.746	10.534
12	103	10	16	14.365	9.129		12	127	13	13	13.059	12.382		12	102	10	15	15.253	8.514		12	138	12	16	17.161	10.239
13	149	13	14	15.071	12.588		13	180	16	18	18.363	12.481		13	201	17	20	20.697	12.365
14	163	16	13	16.616	12.49		14	106	14	12	13.837	9.754		14	156	17	13	15.753	12.609
							15	185	19	16	18.298	12.873		15	132	11	19	17.685	9.503
							16	87	12	11	12.429	8.912		16	155	16	13	15.501	12.731
							17	112	14	11	13.355	10.678		17	210	22	15	20.271	13.19
							18	152	12	16	15.975	12.115		18	409	50	23	41.499	12.549
							19	188	17	18	19.607	12.209		19	117	21	10	18.889	7.886
							20	152	17	12	18.186	10.642		20	102	13	11	13.24	9.809
							21	150	14	14	15.021	12.715		21	97	12	13	12.998	9.502
							22	132	13	16	15.076	11.148
							23	218	18	24	21.078	13.168
							24	126	13	21	21.819	7.353
							25	160	11	19	19.11	10.66
							26	146	13	18	16.091	11.553
	71.5385	12.6923	10.3846	14.475	7.26115			123.462	13.8462	13.8462	15.1708	11.9562			300	20.7692	28.8462	27.2412	16.1792			216.923	17.3077	20.7692	20.8373	15.2942
	108.462	11.5385	17.3077	15.4996	10.2808			263.077	15	28.8462	26.0342	14.8454			170.769	15	18.4615	17.3042	14.4981			293.077	25.3846	18.4615	25.2127	17.0769
	132.692	10.3846	19.6154	19.7204	9.885			124.615	13.8462	13.8462	14.8754	12.3069			331.154	25.3846	26.5385	24.1142	20.175			253.846	19.6154	23.0769	21.8573	17.0619
	178.846	30	11.5385	27.6531	9.50192			117.692	10.3846	16.1538	16.7723	10.3085			173.077	13.8462	20.7692	21.1131	12.0427			223.846	18.4615	21.9231	20.6481	15.9265
	79.6154	10.3846	11.5385	11.5685	10.1112			140.769	11.5385	17.3077	17.7196	11.6712			190.385	17.3077	17.3077	19.5012	14.3423			150	17.3077	15	18.2515	12.0738
	110.769	12.6923	12.6923	13.8565	11.745			185.769	16.1538	18.4615	18.2158	14.9827			107.308	11.5385	15	13.9788	11.2777			131.538	12.6923	18.4615	16.7896	11.5108
	122.308	13.8462	12.6923	14.6631	12.2538			169.615	13.8462	17.3077	17.5385	14.2073			180	17.3077	17.3077	16.6465	15.8862			111.923	16.1538	10.3846	16.0004	10.2762
	154.615	13.8462	20.7692	19.8785	11.4265			118.846	13.8462	13.8462	15.9519	10.9454			257.308	20.7692	21.9231	25.5796	14.7785			161.538	15	17.3077	18.4454	12.8665
	121.154	10.3846	16.1538	16.4781	10.8012			193.846	16.1538	17.3077	18.3808	15.4938			180	19.6154	15	18.1765	14.5488			124.615	13.8462	12.6923	14.6262	12.5169
	155.769	13.8462	17.3077	16.8185	13.6073			144.231	12.6923	17.3077	17.1127	12.3819			215.769	16.1538	23.0769	25.1262	12.6162			140.769	15	15	17.0146	12.1546
	118.846	11.5385	18.4615	16.575	10.5335			146.538	15	15	15.0681	14.2869			117.692	11.5385	17.3077	17.5996	9.82385			159.231	13.8462	18.4615	19.8012	11.8142
	171.923	15	16.1538	17.3896	14.5246			207.692	18.4615	20.7692	21.1881	14.4012			231.923	19.6154	23.0769	23.8812	14.2673
	188.077	18.4615	15	19.1723	14.4115			122.308	16.1538	13.8462	15.9658	11.2546			180	19.6154	15	18.1765	14.5488
								213.462	21.9231	18.4615	21.1131	14.8535			152.308	12.6923	21.9231	20.4058	10.965
								100.385	13.8462	12.6923	14.3412	10.2831			178.846	18.4615	15	17.8858	14.6896
								129.231	16.1538	12.6923	15.4096	12.3208			242.308	25.3846	17.3077	23.3896	15.2192
								175.385	13.8462	18.4615	18.4327	13.9788			471.923	57.6923	26.5385	47.8835	14.4796
								216.923	19.6154	20.7692	22.6235	14.0873			135	24.2308	11.5385	21.795	9.09923
								175.385	19.6154	13.8462	20.9838	12.2792			117.692	15	12.6923	15.2769	11.3181
								173.077	16.1538	16.1538	17.3319	14.6712			111.923	13.8462	15	14.9977	10.9638
								152.308	15	18.4615	17.3954	12.8631
								251.538	20.7692	27.6923	24.3208	15.1938
								145.385	15	24.2308	25.1758	8.48423
								184.615	12.6923	21.9231	22.05	12.3
								168.462	15	20.7692	18.5665	13.3304
								0	0	0	0	0
								length							area
								Per animal means							Per animal means
									18.2123	18.6804	25.3569	17.0896	14.475		259.615	189.643	302.308	156.923	71.5385
									17.0112	17.1504	26.8835	26.1335	15.4996		279.231	169.286	279.231	357.692	108.462
									30.0115	18.6621	22.3361	26.4854	19.7204		316.154	199.286	258.462	240	132.692
									17.2558	20.3293	25.2335	21.7246	27.6531		203.077	204.643	226.154	257.308	178.846
									17.8973	21.2389	20.8685	17.8569	11.5685		223.846	184.286	250.385	168.462	79.6154
									24.7442	22.2054	23.2511	23.4554	13.8565		226.154	183.214	201.923	199.615	110.769
									14.5015	19.8493	28.4273	19.8808	14.6631		317.308	214.286	214.615	216.923	122.308
									33.8896	20.8168	28.1596	27.1535	19.8785		298.846	236.786	243.462	306.923	154.615
									25.2381	18.2068	20.1208	20.9885	16.4781		295.385	193.929	228.462	273.462	121.154
									20.3619	25.0371	23.4127	23.8846	16.8185		220.385	361.071	276.923	248.077	155.769
									18.0935	19.5846	19.6789	22.5646	16.575		192.692	241.071	183.462	201.923	118.846
									20.2396	27.2486	28.0592	24.2954	17.3896		133.846	326.786	258.462	248.077	171.923
									24.9346	21.7007	15.9427	24.2758	19.1723		133.846	243.214	118.846	201.923	188.077
									22.4642	19.4046	19.9188	20.1715	15.1708		319.615	166.071	163.846	207.692	123.462
									26.4912	30.5215	15.9727	16.7585	26.0342		135	256.154	161.538	156.923	263.077
									29.6619	25.3719	15.3139	14.5535	14.8754		195	271.154	145.385	124.615	124.615
									25.0304	28.4608	16.4388	25.6639	16.7723		245.769	406.154	169.615	223.846	117.692
									26.8788	24.2977	23.115	17.3261	17.7196		140.769	304.615	330	135	140.769
									30.7915	28.6973	19.4527	26.0331	18.2158		257.308	330	211.154	302.308	185.769
									37.6085	19.9627	22.4204	21.7535	17.5385		214.615	214.615	213.462	246.923	169.615
									22.4688	21.6473	18.8827	24.4027	15.9519		177.692	263.077	218.077	230.769	118.846
									21.4027	22.2011	25.2335	20.1739	18.3808		159.231	257.308	311.538	200.769	193.846
									25.0696	27.6115	23.7796	23.1392	17.1127		188.077	333.462	264.231	302.308	144.231
									27.99	22.7781	21.3739	17.0446	15.0681		408.461	293.077	253.846	168.462	146.538
									25.1135	28.9696	20.0654	22.1446	21.1881		280.385	162.692	235.385	220.385	207.692
									23.0377	21.7188	23.4842	23.2212	15.9658		249.231	252.692	221.538	204.231	122.308
									23.5419	19.1481	22.0073	19.9085	21.1131		346.154	211.154	201.923	178.846	213.462
									21.2181	19.0569	24.5896	19.1965	14.3412		364.615	185.769	253.846	223.846	100.385
										16.1342	23.9504	17.1819	15.4096			132.692	236.538	133.846	129.231
										20.1162	19.6811	21.3162	18.4327			249.231	206.538	271.154	175.385
										20.2788	20.0573	33.6058	22.6235			185.769	207.692	369.231	216.923
										33.6912	19.1515	25.0962	20.9839			387.692	182.308	338.077	175.385
										24.0081	19.3085	30.1027	17.3319			238.846	198.462	362.308	173.077
										20.2454	25.65	25.7631	17.3954			199.615	308.077	218.077	152.308
										22.3662	19.3662	34.8738	24.3208			258.462	214.615	380.769	251.538
										28.4388	24.4465	29.5062	25.1758			384.231	240	356.538	145.385
											26.6389	28.0823	22.05				286.154	338.077	184.615
											22.3281	19.9338	18.5665				231.923	211.154	168.462
											33.9715	29.7323	27.2412				349.615	347.308	300
											18.6254	18.2942	17.3042				175.385	159.231	170.769
											17.1023	21.7073	24.1142				139.615	197.308	331.154
											22.3281	17.5546	21.1131				231.923	135	173.077
											17.3815	22.77	19.5011				128.077	124.615	190.385
											14.4023		13.9788				109.615		107.308
											22.4146		16.6465				163.846		180
											15.7939		25.5796				114.231		257.308
											24.8169		18.1765				255		180
											20.5062		25.1261				242.308		215.769
											32.4208		17.5996				384.231		117.692
											33.2792		23.8812				350.769		231.923
											22.0004		18.1765				264.231		180
											21.3704		20.4058				166.154		152.308
											20.4762		17.8858				206.538		178.846
													23.3896						242.308
													47.8835						471.923
													21.795						135
													15.2769						117.692
													14.9977						111.923
													20.8373						216.923
													25.2127						293.077
													21.8573						253.846
													20.6481						223.846
													18.2515						150
													16.7896						131.538
													16.0004						111.923
													18.4454						161.538
													14.6262						124.615
													17.0146						140.769
													19.8011						159.231
									23.97	22.6621	22.2122	22.8558	19.2905		242.225	247.001	226.263	235.975	172.057

## Sheet: RN_proj
Confon_NTSR_186 cell size1										Confon_NTSR_186 cell size2									Confon_NTSR_186 cell size3									Confon_NTSR_186 cell size4									Confon_NTSR_186 cell size5
cell	area	width-box	height- box	major- ellipse	minor- ellipse		uM/ pixels			cell	area	width-box	height- box	major- ellipse	minor- ellipse		uM/ pixels		cell	area	width-box	height- box	major- ellipse	minor- ellipse		uM/ pixels		cell	area	width-box	height- box	major- ellipse	minor- ellipse		uM/ pixels		cell	area	width-box	height- box	major- ellipse	minor- ellipse		uM/ pixels
scale	26	13	2	14.669	2.257		1.15385			scale	26	13	2	14.669	2.257		1.15385		scale	26	13	2	14.669	2.257		1.15385		scale	26	13	2	14.669	2.257		1.15385		scale	26	13	2	14.669	2.257		1.15385
1	252	20	17	19.87	16.148		1.15385			1	158	15	13	15.346	13.109		1.15385		1	234	21	17	19.968	14.921		1.15385		1	227	19	17	17.145	16.858		1.15385		1	293	21	19	21.159	17.632		1.15385
2	174	14	17	16.673	13.288		1.15385			2	234	24	14	23.286	12.794		1.15385		2	333	33	17	30.206	14.037		1.15385		2	240	18	19	18.87	16.194		1.15385		2	349	19	25	23.815	18.659		1.15385
3	198	19	15	18.888	13.347		1.15385			3	317	25	20	22.015	18.334		1.15385		3	323	23	25	24.692	16.655		1.15385		3	164	18	13	16.79	12.437		1.15385		3	242	17	21	18.819	16.373		1.15385
4	186	17	16	17.468	13.558		1.15385			4	296	28	16	28.268	13.332		1.15385		4	278	20	21	24.207	14.622		1.15385		4	244	17	19	20.133	15.431		1.15385		4	182	23	13	20.528	11.289		1.15385
5	231	22	16	19.767	14.879		1.15385			5	205	17	17	16.419	15.897		1.15385		5	223	22	16	20.459	13.878		1.15385		5	193	16	18	17.568	13.988		1.15385		5	97	12	13	11.573	10.672		1.15385
6	200	20	15	19.989	12.74		1.15385			6	264	22	33	21.878	15.364		1.15385		6	194	14	21	19.221	12.851		1.15385		6	227	12	25	25.466	11.349		1.15385		6	132	17	13	17.223	9.758		1.15385
7	211	24	13	23.008	11.677		1.15385			7	240	26	15	23.735	12.874		1.15385		7	118	16	12	16.759	8.965		1.15385		7	188	15	19	17.115	13.986		1.15385
8	86	12	10	11.919	9.187		1.15385			8	312	18	25	24.012	16.544		1.15385		8	150	17	13	16.57	11.526		1.15385		8	269	16	26	24.599	13.923		1.15385
										9	317	29	19	25.597	15.768		1.15385		9	213	16	17	16.948	16.002		1.15385		9	311	21	22	25.273	15.668		1.15385
										10	252	18	21	19.321	16.607		1.15385		10	246	17	22	21.944	14.273		1.15385		10	164	18	13	16.79	12.437		1.15385
										11	278	33	19	28.925	12.237		1.15385		11	217	15	21	20.862	13.244		1.15385		11	264	33	17	26.267	12.797		1.15385
										12	254	23	17	21.773	14.853		1.15385											12	370	31	23	26.188	17.989		1.15385
										13	168	14	28	22.299	9.592		1.15385											13	379	26	20	25.448	18.962		1.15385
										14	118	15	12	14.314	10.496		1.15385											14	257	20	26	29.069	11.257		1.15385
										15	99	14	10	13.584	9.279		1.15385											15	346	27	19	25.588	17.217		1.15385
uM										16	98	12	11	12.163	10.259		1.15385											16	215	18	18	17.253	15.866		1.15385
1	290.769	23.0769	19.6154	22.9269	18.6323					17	99	14	10	13.584	9.279		1.15385
2	200.769	16.1538	19.6154	19.2381	15.3323
3	228.462	21.9231	17.3077	21.7938	15.4004
4	214.615	19.6154	18.4615	20.1554	15.6438
5	266.538	25.3846	18.4615	22.8081	17.1681					uM									uM									uM									uM
6	230.769	23.0769	17.3077	23.0642	14.7					1	182.308	17.3077	15	17.7069	15.1258				1	270	24.2308	19.6154	23.04	17.2165				1	261.923	21.9231	19.6154	19.7827	19.4515				1	338.077	24.2308	21.9231	24.4142	20.3446
7	243.462	27.6923	15	26.5477	13.4735					2	270	27.6923	16.1538	26.8685	14.7623				2	384.231	38.0769	19.6154	34.8531	16.1965				2	276.923	20.7692	21.9231	21.7731	18.6854				2	402.692	21.9231	28.8462	27.4788	21.5296
8	99.2308	13.8462	11.5385	13.7527	10.6004					3	365.769	28.8462	23.0769	25.4019	21.1546				3	372.692	26.5385	28.8462	28.4908	19.2173				3	189.231	20.7692	15	19.3731	14.3504				3	279.231	19.6154	24.2308	21.7142	18.8919
										4	341.538	32.3077	18.4615	32.6169	15.3831				4	320.769	23.0769	24.2308	27.9312	16.8715				4	281.538	19.6154	21.9231	23.2304	17.805				4	210	26.5385	15	23.6862	13.0258
										5	236.538	19.6154	19.6154	18.945	18.3427				5	257.308	25.3846	18.4615	23.6065	16.0131				5	222.692	18.4615	20.7692	20.2708	16.14				5	111.923	13.8462	15	13.3535	12.3138
										6	304.615	25.3846	38.0769	25.2438	17.7277				6	223.846	16.1538	24.2308	22.1781	14.8281				6	261.923	13.8462	28.8462	29.3838	13.095				6	152.308	19.6154	15	19.8727	11.2592
										7	276.923	30	17.3077	27.3865	14.8546				7	136.154	18.4615	13.8462	19.3373	10.3442				7	216.923	17.3077	21.9231	19.7481	16.1377
										8	360	20.7692	28.8462	27.7062	19.0892				8	173.077	19.6154	15	19.1192	13.2992				8	310.385	18.4615	30	28.3835	16.065
										9	365.769	33.4615	21.9231	29.535	18.1938				9	245.769	18.4615	19.6154	19.5554	18.4638				9	358.846	24.2308	25.3846	29.1612	18.0785
										10	290.769	20.7692	24.2308	22.2935	19.1619				10	283.846	19.6154	25.3846	25.32	16.4688				10	189.231	20.7692	15	19.3731	14.3504
										11	320.769	38.0769	21.9231	33.375	14.1196				11	250.385	17.3077	24.2308	24.0715	15.2815				11	304.615	38.0769	19.6154	30.3081	14.7658
										12	293.077	26.5385	19.6154	25.1227	17.1381													12	426.923	35.7692	26.5385	30.2169	20.7565
										13	193.846	16.1538	32.3077	25.7296	11.0677													13	437.308	30	23.0769	29.3631	21.8792
										14	136.154	17.3077	13.8462	16.5162	12.1108													14	296.538	23.0769	30	33.5412	12.9888
										15	114.231	16.1538	11.5385	15.6738	10.7065													15	399.231	31.1538	21.9231	29.5246	19.8658
										16	113.077	13.8462	12.6923	14.0342	11.8373													16	248.077	20.7692	20.7692	19.9073	18.3069
										17	114.231	16.1538	11.5385	15.6738	10.7065														0
ntsr_011320_confonyfp_cellsize1
cell	area	width-box	height- box	major- ellipse	minor- ellipse		uM/ pixels		ntsr_011320_confonyfp_cellsize2									ntsr_011320_confonyfp_cellsize3
1	28	14	2	15.797	2.257		1.07143		cell	area	width-box	height- box	major- ellipse	minor- ellipse		uM/ pixels		cell	area	width-box	height- box	major- ellipse	minor- ellipse
2	190	19	16	18.009	13.433				1	26	13	2	14.669	2.257		1.15385		1	28	14	2	15.797	2.257		1.07143
3	148	14	15	15.766	11.952				2	386	30	19	31.128	15.789				2	247	18	22	19.072	16.49
4	265	22	19	20.351	16.579				3	183	14	17	18.028	12.924				3	339	17	29	29.55	14.607
5	410	28	24	28.861	18.087				4	184	15	17	17.734	13.211				4	291	26	17	24.845	14.913
6	250	17	24	22.331	14.254				5	232	19	20	17.607	16.777				5	206	17	18	16.751	15.658
7	237	20	20	19.242	15.682														6	119	13	12	13.3
8	250	17	24	22.331	14.254
cell	area	width-box	height- box	major- ellipse	minor- ellipse		uM/ pixels		ntsr_011320_confonyfp_cellsize2									ntsr_011320_confonyfp_cellsize3
1	30	15	2.14286	16.9254	2.41821		1.07143		cell	area	width-box	height- box	major- ellipse	minor- ellipse		uM/ pixels		cell	area	width-box	height- box	major- ellipse	minor- ellipse
2	203.571	20.3571	17.1429	19.2954	14.3925				1	30	15	2.30769	16.9258	2.60423				1	30	15	2.14286	16.9254	2.41821
3	158.571	15	16.0714	16.8921	12.8057				2	445.385	34.6154	21.9231	35.9169	18.2181				2	264.643	19.2857	23.5714	20.4343	17.6679
4	283.929	23.5714	20.3571	21.8046	17.7632				3	211.154	16.1538	19.6154	20.8015	14.9123				3	363.214	18.2143	31.0714	31.6607	15.6504
5	439.286	30	25.7143	30.9225	19.3789				4	212.308	17.3077	19.6154	20.4623	15.2435				4	311.786	27.8571	18.2143	26.6196	15.9782
6	267.857	18.2143	25.7143	23.9261	15.2721				5	267.692	21.9231	23.0769	20.3158	19.3581				5	220.714	18.2143	19.2857	17.9475	16.7764
7	253.929	21.4286	21.4286	20.6164	16.8021
8	267.857	18.2143	25.7143	23.9261	15.2721
Ntsr1_333 cell size1									Ntsr1_333 cell size2								Ntsr1_333 cell size3
cell	area	width-box	height- box	major- ellipse	minor- ellipse				cell	area	width-box	height- box	major- ellipse	minor- ellipse			cell	area	width-box	height- box	major- ellipse	minor- ellipse
1	26	13	2	14.669	2.257				1	26	13	2	14.669	2.257			1	26	13	2	14.669	2.257	0
2	160	15	17	17.143	11.884				2	92	11	17	16.14	7.258			2	191	19	15	18.751	12.969	18.441
3	271	17	31	23.619	14.609				3	156	16	14	15.885	12.504			3	173	17	15	18.393	11.976	34.793
4	261	22	22	18.572	17.893				4	176	15	19	17.302	12.952			4	180	15	17	16.666	13.752	63.002
5	263	28	28	30.728	10.898				5	156	15	14	15.795	12.575
									6	196	18	17	20.078	12.429
									7	167	17	19	18.998	11.192
									8	156	16	16	14.554	13.647
									9	139	14	19	18.346	9.647
	184.615	17.3077	19.6154	19.7804	13.7123					106.154	12.6923	19.6154	18.6231	8.37462				220.385	21.9231	17.3077	21.6358	14.9642	21.2781
	312.692	19.6154	35.7692	27.2527	16.8565					180	18.4615	16.1538	18.3288	14.4277				199.615	19.6154	17.3077	21.2227	13.8185	40.1458
	301.154	25.3846	25.3846	21.4292	20.6458					203.077	17.3077	21.9231	19.9638	14.9446				207.692	17.3077	19.6154	19.23	15.8677	72.6946
										180	17.3077	16.1538	18.225	14.5096
										226.154	20.7692	19.6154	23.1669	14.3412
										192.692	19.6154	21.9231	21.9208	12.9138
										180	18.4615	18.4615	16.7931	15.7465
										160.385	16.1538	21.9231	21.1685	11.1312
Ntsr1_334_cellsize1									Ntsr1_334_cellsize2										Ntsr1_334_cellsize5								Ntsr1_334_cellsize6
cell	area	width-box	height- box	major- ellipse	minor- ellipse				cell	area	width-box	height- box	major- ellipse	minor- ellipse					cell	area	width-box	height- box	major- ellipse	minor- ellipse			cell	area	width-box	height- box	major- ellipse	minor- ellipse
1	26	13	2	14.669	2.257				1	26	13	2	14.669	2.257					1	26	13	2	14.669	2.257			1	26	13	2	14.669	2.257
2	208	18	19	17.78	14.895				2	244	16	28	28.549	10.882					2	192	20	14	19.286	12.675			2	211	17	17	17.287	15.541
3	123	13	14	14.592	10.732				3	154	15	15	14.818	13.233					3	134	17	13	16.88	10.107			3	191	21	21	25.75	9.444
4	165	15	19	21.475	9.783														4	248	27	21	22.944	13.762			4	247	23	21	25.554	12.307
																			5	215	20	17	19.972	13.706			5	158	15	17	18.293	10.997
																			6	175	11	24	21.466	10.38			6	184	21	14	20.15	11.626
																			7	144	13	15	14.409	12.725			7	140	12	17	17.222	10.35
	240	20.7692	21.9231	20.5154	17.1865					281.538	18.4615	32.3077	32.9412	12.5562					8	222	18	19	20.413	13.847			8	148	15	15	17.778	10.6
	141.923	15	16.1538	16.8369	12.3831					177.692	17.3077	17.3077	17.0977	15.2688					9	146	12	17	17.31	10.739
	190.385	17.3077	21.9231	24.7788	11.2881														10	160	19	15	19.172	10.626
																			11	134	15	15	16.645	10.25
																			12	146	20	15	21.781	8.535
Ntsr1_334_cellsize4																			13	144	15	14	14.757	12.424
cell	area	width-box	height- box	major- ellipse	minor- ellipse
1	26	13	2	14.669	2.257																							243.462	19.6154	19.6154	19.9465	17.9319
2	257	20	21	20.741	15.776															221.538	23.0769	16.1538	22.2531	14.625				220.385	24.2308	24.2308	29.7115	10.8969
3	231	20	19	17.622	16.69															154.615	19.6154	15	19.4769	11.6619				285	26.5385	24.2308	29.4854	14.2004
4	194	19	14	17.861	13.83															286.154	31.1538	24.2308	26.4738	15.8792				182.308	17.3077	19.6154	21.1073	12.6888
5	169	19	13	18.664	11.529															248.077	23.0769	19.6154	23.0446	15.8146				212.308	24.2308	16.1538	23.25	13.4146
6	181	21	15	18.874	12.21															201.923	12.6923	27.6923	24.7685	11.9769				161.538	13.8462	19.6154	19.8715	11.9423
7	185	25	13	25.074	9.394															166.154	15	17.3077	16.6258	14.6827				170.769	17.3077	17.3077	20.5131	12.2308
8	148	17	14	14.653	12.861															256.154	20.7692	21.9231	23.5535	15.9773
9	124	17	11	15.926	9.914															168.462	13.8462	19.6154	19.9731	12.3912
10	175	14	18	16.796	13.266															184.615	21.9231	17.3077	22.1215	12.2608
11	126	15	11	14.263	11.248															154.615	17.3077	17.3077	19.2058	11.8269
12	186	20	16	19.171	12.353															168.462	23.0769	17.3077	25.1319	9.84808
13	220	23	16	21.077	13.29															166.154	17.3077	16.1538	17.0273	14.3354
14	272	25	19	25.776	13.436
15	207	20	18	17.268	15.263
	296.538	23.0769	24.2308	23.9319	18.2031
	266.538	23.0769	21.9231	20.3331	19.2577
	223.846	21.9231	16.1538	20.6088	15.9577
	195	21.9231	15	21.5354	13.3027
	208.846	24.2308	17.3077	21.7777	14.0885
	213.462	28.8462	15	28.9315	10.8392
	170.769	19.6154	16.1538	16.9073	14.8396
	143.077	19.6154	12.6923	18.3762	11.4392
	201.923	16.1538	20.7692	19.38	15.3069
	145.385	17.3077	12.6923	16.4573	12.9785
	214.615	23.0769	18.4615	22.1204	14.2535
	253.846	26.5385	18.4615	24.3196	15.3346
	313.846	28.8462	21.9231	29.7415	15.5031
	238.846	23.0769	20.7692	19.9246	17.6112
length						area
22.9269	19.2954	19.7804	20.5154			290.769	203.571	184.615	240
19.2381	16.8921	27.2527	16.8369			200.769	158.571	312.692	141.923
21.7938	21.8046	21.4292	24.7788			228.462	283.929	301.154	190.385
20.1554	30.9225	18.6231	32.9412			214.615	439.286	106.154	281.538
22.8081	23.9261	18.3288	17.0977			266.538	267.857	180	177.692
23.0642	20.6164	19.9638	22.2531			230.769	253.929	203.077	221.538
26.5477	23.9261	18.225	19.4769			243.462	267.857	180	154.615
13.7527	35.9169	23.1669	26.4738			99.2308	445.385	226.154	286.154
17.7069	20.8015	21.9208	23.0446			182.308	211.154	192.692	248.077
26.8685	20.4623	16.7931	24.7685			270	212.308	180	201.923
25.4019	20.3158	21.1685	16.6258			365.769	267.692	160.385	166.154
32.6169	20.4343	14.9642	23.5535			341.538	264.643	220.385	256.154
18.945	31.6607	13.8185	19.9731			236.538	363.214	199.615	168.462
25.2438	26.6196	15.8677	22.1215			304.615	311.786	207.692	184.615
27.3865	17.9475		19.2058			276.923	220.714		154.615
27.7062			25.1319			360			168.462
29.535			17.0273			365.769			166.154
22.2935			19.9465			290.769			243.462
33.375			29.7115			320.769			220.385
25.1227			29.4854			293.077			285
25.7296			21.1073			193.846			182.308
16.5161			23.25			136.154			212.308
15.6738			19.8715			114.231			161.538
14.0342			20.5131			113.077			170.769
15.6738			23.9319			114.231			296.538
23.04			20.3331			270			266.538
34.8531			20.6089			384.231			223.846
28.4908			21.5354			372.692			195
27.9311			21.7777			320.769			208.846
23.6065			28.9315			257.308			213.462
22.1781			16.9073			223.846			170.769
19.3373			18.3761			136.154			143.077
19.1192			19.38			173.077			201.923
19.5554			16.4573			245.769			145.385
25.32			22.1204			283.846			214.615
24.0715			24.3196			250.385			253.846
19.7827			29.7415			261.923			313.846
21.7731			19.9246			276.923			238.846
19.3731						189.231
23.2304						281.538
20.2708						222.692
29.3838						261.923
19.7481						216.923
28.3835						310.385
29.1611						358.846
19.3731						189.231
30.3081						304.615
30.2169						426.923
29.3631						437.308
33.5412						296.538
29.5246						399.231
19.9073						248.077
24.4142						338.077
27.4789						402.692
21.7142						279.231
23.6862						210
13.3535						111.923
19.8727						152.308
23.6462	23.4361	19.3788	22.1068			261.187	278.126	203.901	209.757

## Sheet: Vgat_YFP
Vgat_102220_Rear Cell size1									Vgat_102220_Rear Cell size2								Vgat_102220_Rear Cell size3								Vgat_102220_Rear Cell size4
	cell	area	width- box	height- box	major	minor				cell	area	width- box	height- box	major	minor			cell	area	width- box	height- box	major	minor			cell	area	width- box	height- box	major
	1	70	14	5	15.797	5.642				1	65	13	5	14.669	5.642			1	70	14	5	15.797	5.642			1	70	14	5	15.797
	2	64	8	12	12.45	6.545				2	79	10	11	10.848	9.272			2	73	10	10	10.43	8.911			2	134	11	17	16.599
	3	71	9	11	11.873	7.614				3	134	15	13	14.322	11.912			3	88	12	12	13.75	8.149			3	84	10	11	12.195
	4	50	8	8	8.441	7.542				4	55	9	8	9.372	7.472			4	83	10	11	11.101	9.52			4	69	9	11	10.857
	5	78	9	12	11.545	8.602				5	80	10	10	10.452	9.745			5	122	12	15	14.354	10.822			5	114	13	13	13.243
	6	98	14	11	13.811	9.034				6	95	12	10	12.098	9.998			6	74	11	9	10.74	8.773			6	91	10	11	11.74
	7	87	10	11	12.078	9.172				7	67	8	11	11.114	7.675			7	86	10	11	10.935	10.013			7	157	23	12	20.805
	8	113	13	13	14.478	9.937				8	49	8	9	8.456	7.378			8	96	13	10	13.405	9.118			8	74	8	12	12.742
	9	113	13	12	12.737	11.296				9	76	8	12	12.718	7.609			9	103	11	14	13.212	9.926
	10	75	9	11	10.626	8.987				10	70	10	9	10.447	8.531			10	81	9	14	13.075	7.888
	11	96	11	12	12.035	10.156				11	59	10	9	11.46	6.555			11	82	11	9	11.365	9.187
	12	74	10	13	13.334	7.066				12	81	13	9	13.405	7.693			12	64	7	13	11.861	6.87
	13	74	10	10	9.99	9.431				13	61	10	8	9.81	7.917			13	56	8	10	9.333	7.64
	14	76	9	12	11.57	8.364				14	162	19	13	17.576	11.735			14	79	10	12	12.27	8.197
	15	148	12	16	15.983	11.79				15	72	12	10	10.527	8.708			15	95	11	12	12.114	9.985
	16	136	20	11	16.77	10.326				16	72	10	9	10.991	8.341			16	73	10	11	10.823	8.588
	17	65	9	10	9.653	8.574				17	99	11	12	12.164	10.363			17	65	11	9	12.636	6.549
	18	66	11	9	10.519	7.989				18	110	11	13	13.437	10.423			18	72	12	9	11.99	7.646
	19	96	11	13	13.107	9.326				19	78	10	10	10.248	9.691			19	53	8	9	9.112	7.406
	20	94	11	11	11.821	10.125				20	95	12	11	12.993	9.309			20	102	14	13	14.53	8.938
	21	105	15	11	16.334	8.185				21	86	10	11	11.318	9.675
	22	120	15	12	13.587	11.245				22	115	11	15	15.915	9.2
	23	104	12	14	14.119	9.379				23	114	12	13	13.602	10.671
	24	117	12	15	14.473	10.293				24	73	10	10	10.595	8.772
	25	68	10	9	10.608	8.162				25	86	10	11	11.318	9.675
	26	99	10	15	13.563	9.294				26	98	11	14	14.169	8.806
	27	96	9	13	13.361	9.148				27	122	12	14	13.491	11.514
	28	102	13	12	12.933	10.042				28	87	10	12	12.082	9.168
	29	75	9	12	11.186	8.537				29	88	10	13	13.559	8.263
	30	118	12	14	14.919	10.07				30	87	10	12	12.082	9.168
	31	63	8	11	10.596	7.57				31	122	12	14	13.491	11.514
	32	114	13	13	14.598	9.943				32	90	11	13	11.665	9.824
										33	95	11	12	13.356	9.056
										34	102	10	16	15.389	8.439
										35	122	13	12	14.336	10.835
										36	59	9	9	9.055	8.296
										37	74	11	9	10.559	8.923
										38	68	8	10	10.426	8.304
Vgat_102220_Rear Cell size1									Vgat_102220_Rear Cell size2								Vgat_102220_Rear Cell size3								Vgat_102220_Rear Cell size4
		area	width- box	height- box	major	minor				cell	area	width- box	height- box	major	minor			cell	area	width- box	height- box	major	minor			cell	area	width- box	height- box	major
		68.5714	8.57143	12.8571	13.3393	7.0125					91.1538	11.5385	12.6923	12.5169	10.6985				78.2143	10.7143	10.7143	11.175	9.5475				143.571	11.7857	18.2143	17.7846
		76.0714	9.64286	11.7857	12.7211	8.15786					154.615	17.3077	15	16.5254	13.7446				94.2857	12.8571	12.8571	14.7321	8.73107				90	10.7143	11.7857	13.0661
		53.5714	8.57143	8.57143	9.04393	8.08071					63.4615	10.3846	9.23077	10.8138	8.62154				88.9286	10.7143	11.7857	11.8939	10.2				73.9286	9.64286	11.7857	11.6325
		83.5714	9.64286	12.8571	12.3696	9.21643					92.3077	11.5385	11.5385	12.06	11.2442				130.714	12.8571	16.0714	15.3793	11.595				122.143	13.9286	13.9286	14.1889
		105	15	11.7857	14.7975	9.67929					109.615	13.8462	11.5385	13.9592	11.5362				79.2857	11.7857	9.64286	11.5071	9.39964				97.5	10.7143	11.7857	12.5786
		93.2143	10.7143	11.7857	12.9407	9.82714					77.3077	9.23077	12.6923	12.8238	8.85577				92.1429	10.7143	11.7857	11.7161	10.7282				168.214	24.6429	12.8571	22.2911
		121.071	13.9286	13.9286	15.5121	10.6468					56.5385	9.23077	10.3846	9.75692	8.51308				102.857	13.9286	10.7143	14.3625	9.76929				79.2857	8.57143	12.8571	13.6521
		121.071	13.9286	12.8571	13.6468	12.1029					87.6923	9.23077	13.8462	14.6746	8.77962				110.357	11.7857	15	14.1557	10.635
		80.3571	9.64286	11.7857	11.385	9.62893					80.7692	11.5385	10.3846	12.0542	9.84346				86.7857	9.64286	15	14.0089	8.45143
		102.857	11.7857	12.8571	12.8946	10.8814					68.0769	11.5385	10.3846	13.2231	7.56346				87.8571	11.7857	9.64286	12.1768	9.84321
		79.2857	10.7143	13.9286	14.2864	7.57071					93.4615	15	10.3846	15.4673	8.87654				68.5714	7.5	13.9286	12.7082	7.36071
		79.2857	10.7143	10.7143	10.7036	10.1046					70.3846	11.5385	9.23077	11.3192	9.135				60	8.57143	10.7143	9.99964	8.18571
		81.4286	9.64286	12.8571	12.3964	8.96143					186.923	21.9231	15	20.28	13.5404				84.6429	10.7143	12.8571	13.1464	8.7825
		158.571	12.8571	17.1429	17.1246	12.6321					83.0769	13.8462	11.5385	12.1465	10.0477				101.786	11.7857	12.8571	12.9793	10.6982
		145.714	21.4286	11.7857	17.9679	11.0636					83.0769	11.5385	10.3846	12.6819	9.62423				78.2143	10.7143	11.7857	11.5961	9.20143
		69.6429	9.64286	10.7143	10.3425	9.18643					114.231	12.6923	13.8462	14.0354	11.9573				69.6429	11.7857	9.64286	13.5386	7.01679
		70.7143	11.7857	9.64286	11.2704	8.55964					126.923	12.6923	15	15.5042	12.0265				77.1429	12.8571	9.64286	12.8464	8.19214
		102.857	11.7857	13.9286	14.0432	9.99214					90	11.5385	11.5385	11.8246	11.1819				56.7857	8.57143	9.64286	9.76286	7.935
		100.714	11.7857	11.7857	12.6654	10.8482					109.615	13.8462	12.6923	14.9919	10.7412				109.286	15	13.9286	15.5679	9.57643
		112.5	16.0714	11.7857	17.5007	8.76964					99.2308	11.5385	12.6923	13.0592	11.1635
		128.571	16.0714	12.8571	14.5575	12.0482					132.692	12.6923	17.3077	18.3635	10.6154
		111.429	12.8571	15	15.1275	10.0489					131.538	13.8462	15	15.6946	12.3127
		125.357	12.8571	16.0714	15.5068	11.0282					84.2308	11.5385	11.5385	12.225	10.1215
		72.8571	10.7143	9.64286	11.3657	8.745					99.2308	11.5385	12.6923	13.0592	11.1635
		106.071	10.7143	16.0714	14.5318	9.95786					113.077	12.6923	16.1538	16.3488	10.1608
		102.857	9.64286	13.9286	14.3154	9.80143					140.769	13.8462	16.1538	15.5665	13.2854
		109.286	13.9286	12.8571	13.8568	10.7593					100.385	11.5385	13.8462	13.9408	10.5785
		80.3571	9.64286	12.8571	11.985	9.14679					101.538	11.5385	15	15.645	9.53423
		126.429	12.8571	15	15.9846	10.7893					100.385	11.5385	13.8462	13.9408	10.5785
		67.5	8.57143	11.7857	11.3529	8.11071					140.769	13.8462	16.1538	15.5665	13.2854
		122.143	13.9286	13.9286	15.6407	10.6532					103.846	12.6923	15	13.4596	11.3354
											109.615	12.6923	13.8462	15.4108	10.4492
											117.692	11.5385	18.4615	17.7565	9.73731
											140.769	15	13.8462	16.5415	12.5019
											68.0769	10.3846	10.3846	10.4481	9.57231
											85.3846	12.6923	10.3846	12.1835	10.2958
											78.4615	9.23077	11.5385	12.03	9.58154
Vgat_102220_Lear Cell size1									Vgat_102220_Lear Cell size2									Vgat_102220_Lear Cell size3									Vgat_102220_Lear Cell size4
	cell	area	width- box	height- box	major	minor				cell	area	width- box	height- box	major	minor				cell	area	width- box	height- box	major	minor				cell	area	width- box
	1	65	13	5	14.669	5.642				1	65	13	5	14.669	5.642				1	70	14	5	15.797	5.642				1	65	13
	2	62	9	9	9.641	8.188				2	110	15	13	14.822	9.449				2	94	15	10	13.879	8.624				2	76	8
	3	111	13	10	13.67	10.339				3	100	13	14	12.741	9.993				3	94	9	14	13.278	9.014				3	111	12
	4	51	7	9	8.898	7.298				4	153	14	16	14.618	13.326				4	123	17	12	15.008	10.435				4	68	10
	5	74	10	9	10.408	9.053				5	117	11	14	15.223	9.786				5	60	10	8	9.625	7.937				5	105	12
	6	99	13	10	12.439	10.134				6	133	11	17	17.847	9.489				6	79	11	11	11.631	8.648				6	143	13
	7	87	10	14	14.382	7.702				7	129	14	14	13.552	12.119				7	185	16	21	19.277	12.219				7	88	10
	8	74	10	10	10.011	9.411				8	125	12	18	16.975	9.376				8	81	10	10	10.723	9.618				8	117	12
	9	114	11	14	14.583	9.953				9	102	11	12	12.078	10.753				9	95	12	14	11.264	10.738				9	74	9
	10	82	9	11	11.217	9.308				10	51	10	7	10.007	6.489				10	160	14	19	15.747	12.937				10	105	11
	11	82	11	10	11.148	9.365				11	221	23	19	19.577	14.374				11	111	9	18	16.376	8.63				11	152	15
	12	159	14	18	17.949	11.279				12	151	16	16	16.14	11.912				12	75	8	12	12.434	7.68				12	124	13
										13	88	11	12	11.787	9.506				13	87	9	14	12.905	8.584				13	155	12
										14	176	16	22	18.08	12.394				14	103	11	12	11.508	11.396				14	93	10
										15	114	12	15	14.153	10.255				15	175	12	21	19.376	11.499				15	101	12
										16	64	10	8	10.304	7.908				16	169	16	19	17.399	12.367				16	109	12
										17	70	9	12	11.311	7.879				17	131	13	16	14.824	11.252				17	110	11
										18	70	9	12	11.311	7.879				18	210	14	25	20.627	12.962				18	109	11
										19	95	13	10	13.02	9.29				19	139	14	18	18.359	9.64				19	58	10
										20	114	15	12	14.548	9.977				20	130	13	14	14.052	11.779
										21	75	12	10	13.523	7.061				21	162	20	13	17.291	11.929
										22	95	13	10	13.02	9.29				22	100	13	11	13.605	9.359
										23	123	13	14	13.564	11.546				23	168	17	14	16.069	13.312
										24	131	14	13	13.742	12.138				24	98	11	13	12.236	10.198
										25	57	10	8	10.652	6.813				25	141	15	15	14.388	12.478
		71.5385	10.3846	10.3846	11.1242	9.44769					126.923	17.3077	15	17.1023	10.9027					100.714	16.0714	10.7143	14.8704	9.24					87.6923	9.23077
		128.077	15	11.5385	15.7731	11.9296					115.385	15	16.1538	14.7012	11.5304					100.714	9.64286	15	14.2264	9.65786					128.077	13.8462
		58.8462	8.07692	10.3846	10.2669	8.42077					176.538	16.1538	18.4615	16.8669	15.3762					131.786	18.2143	12.8571	16.08	11.1804					78.4615	11.5385
		85.3846	11.5385	10.3846	12.0092	10.4458					135	12.6923	16.1538	17.565	11.2915					64.2857	10.7143	8.57143	10.3125	8.50393					121.154	13.8462
		114.231	15	11.5385	14.3527	11.6931					153.462	12.6923	19.6154	20.5927	10.9488					84.6429	11.7857	11.7857	12.4618	9.26571					165	15
		100.385	11.5385	16.1538	16.5946	8.88692					148.846	16.1538	16.1538	15.6369	13.9835					198.214	17.1429	22.5	20.6539	13.0918					101.538	11.5385
		85.3846	11.5385	11.5385	11.5512	10.8588					144.231	13.8462	20.7692	19.5865	10.8185					86.7857	10.7143	10.7143	11.4889	10.305					135	13.8462
		131.538	12.6923	16.1538	16.8265	11.4842					117.692	12.6923	13.8462	13.9362	12.4073					101.786	12.8571	15	12.0686	11.505					85.3846	10.3846
		94.6154	10.3846	12.6923	12.9427	10.74					58.8462	11.5385	8.07692	11.5465	7.48731					171.429	15	20.3571	16.8718	13.8611					121.154	12.6923
		94.6154	12.6923	11.5385	12.8631	10.8058					255	26.5385	21.9231	22.5888	16.5854					118.929	9.64286	19.2857	17.5457	9.24643					175.385	17.3077
		183.462	16.1538	20.7692	20.7104	13.0142					174.231	18.4615	18.4615	18.6231	13.7446					80.3571	8.57143	12.8571	13.3221	8.22857					143.077	15
											101.538	12.6923	13.8462	13.6004	10.9685					93.2143	9.64286	15	13.8268	9.19714					178.846	13.8462
											203.077	18.4615	25.3846	20.8615	14.3008					110.357	11.7857	12.8571	12.33	12.21					107.308	11.5385
											131.538	13.8462	17.3077	16.3304	11.8327					187.5	12.8571	22.5	20.76	12.3204					116.538	13.8462
											73.8462	11.5385	9.23077	11.8892	9.12462					181.071	17.1429	20.3571	18.6418	13.2504					125.769	13.8462
											80.7692	10.3846	13.8462	13.0512	9.09115					140.357	13.9286	17.1429	15.8829	12.0557					126.923	12.6923
											80.7692	10.3846	13.8462	13.0512	9.09115					225	15	26.7857	22.1004	13.8879					125.769	12.6923
											109.615	15	11.5385	15.0231	10.7192					148.929	15	19.2857	19.6704	10.3286					66.9231	11.5385
											131.538	17.3077	13.8462	16.7862	11.5119					139.286	13.9286	15	15.0557	12.6204
											86.5385	13.8462	11.5385	15.6035	8.14731					173.571	21.4286	13.9286	18.5261	12.7811
											109.615	15	11.5385	15.0231	10.7192					107.143	13.9286	11.7857	14.5768	10.0275
											141.923	15	16.1538	15.6508	13.3223					180	18.2143	15	17.2168	14.2629
											151.154	16.1538	15	15.8562	14.0054					105	11.7857	13.9286	13.11	10.9264
											65.7692	11.5385	9.23077	12.2908	7.86115					151.071	16.0714	16.0714	15.4157	13.3693
Vgat_102220_Near Cell size1									Vgat_102220_Near Cell size2									Vgat_102220_Near Cell size3									Vgat_102220_Near Cell size4
	cell	area	width- box	height- box	major	minor				cell	area	width- box	height- box	major	minor				cell	area	width- box	height- box	major	minor				cell	area	width- box
	1	65	13	5	14.669	5.642				1	65	13	5	14.669	5.642				1	70	14	5	15.797	5.642				1	70	14
	2	79	10	10	10.781	9.33				2	70	9	12	11.322	7.872				2	72	10	11	10.398	8.817				2	56	9
	3	76	10	10	10.957	8.832				3	67	9	10	10.134	8.418				3	74	12	11	12.192	7.728				3	110	14
	4	59	9	9	10.011	7.504				4	63	8	12	11.854	6.767				4	91	11	12	13.477	8.597				4	89	10
	5	87	11	10	11.009	10.062				5	63	9	10	10.578	7.583				5	62	8	11	9.854	8.011				5	92	9
	6	85	8	16	15.961	6.781				6	56	9	9	10.112	7.051				6	70	8	12	11.217	7.946				6	114	14
	7	77	11	11	10.597	9.251				7	100	11	13	12.352	10.308				7	87	12	9	12.819	8.641				7	79	9
	8	66	9	10	10.003	8.401				8	140	15	14	14.446	12.339				8	107	13	12	12.907	10.555				8	98	13
	9	92	12	11	11.422	10.255				9	86	9	13	12.762	8.58				9	108	12	12	12.705	10.823				9	61	9
	10	56	8	9	8.902	8.01				10	86	10	11	10.652	10.279				10	78	10	12	12.051	8.241				10	70	10
	11	114	10	19	15.994	9.075				11	132	16	12	15.4	10.913				11	76	12	9	11.863	8.157				11	79	12
	12	109	9	17	15.722	8.827				12	82	13	9	12.682	8.232				12	55	10	8	9.849	7.11				12	111	14
	13	70	8	11	10.816	8.24				13	77	10	12	13.306	7.368				13	80	12	9	12.706	8.016				13	83	11
	14	74	9	11	10.921	8.627				14	61	10	9	9.112	8.524				14	91	11	12	13.477	8.597				14	90	13
	15	123	11	19	18.039	8.682				15	88	10	11	11.319	9.899				15	107	12	14	13.814	9.862				15	159	19
										16	60	9	8	9.229	8.278
										17	61	10	9	9.112	8.524
										18	297	19	23	21.7	17.426
		91.1538	11.5385	11.5385	12.4396	10.7654					80.7692	10.3846	13.8462	13.0638	9.08308					77.1429	10.7143	11.7857	11.1407	9.44679					60	9.64286
		87.6923	11.5385	11.5385	12.6427	10.1908					77.3077	10.3846	11.5385	11.6931	9.71308					79.2857	12.8571	11.7857	13.0629	8.28					117.857	15
		68.0769	10.3846	10.3846	11.5512	8.65846					72.6923	9.23077	13.8462	13.6777	7.80808					97.5	11.7857	12.8571	14.4396	9.21107					95.3571	10.7143
		100.385	12.6923	11.5385	12.7027	11.61					72.6923	10.3846	11.5385	12.2054	8.74962					66.4286	8.57143	11.7857	10.5579	8.58321					98.5714	9.64286
		98.0769	9.23077	18.4615	18.4165	7.82423					64.6154	10.3846	10.3846	11.6677	8.13577					75	8.57143	12.8571	12.0182	8.51357					122.143	15
		88.8462	12.6923	12.6923	12.2273	10.6742					115.385	12.6923	15	14.2523	11.8938					93.2143	12.8571	9.64286	13.7346	9.25821					84.6429	9.64286
		76.1538	10.3846	11.5385	11.5419	9.69346					161.538	17.3077	16.1538	16.6685	14.2373					114.643	13.9286	12.8571	13.8289	11.3089					105	13.9286	minor
		106.154	13.8462	12.6923	13.1792	11.8327					99.2308	10.3846	15	14.7254	9.9					115.714	12.8571	12.8571	13.6125	11.5961					65.3571	9.64286	5.642
		64.6154	9.23077	10.3846	10.2715	9.24231					99.2308	11.5385	12.6923	12.2908	11.8604					83.5714	10.7143	12.8571	12.9118	8.82964					75	10.7143	10.278
		131.538	11.5385	21.9231	18.4546	10.4712					152.308	18.4615	13.8462	17.7692	12.5919					81.4286	12.8571	9.64286	12.7104	8.73964					84.6429	12.8571	8.77
		125.769	10.3846	19.6154	18.1408	10.185					94.6154	15	10.3846	14.6331	9.49846					58.9286	10.7143	8.57143	10.5525	7.61786					118.929	15	8.092
		80.7692	9.23077	12.6923	12.48	9.50769					88.8462	11.5385	13.8462	15.3531	8.50154					85.7143	12.8571	9.64286	13.6136	8.58857					88.9286	11.7857	10.96
		85.3846	10.3846	12.6923	12.6012	9.95423					70.3846	11.5385	10.3846	10.5138	9.83538					97.5	11.7857	12.8571	14.4396	9.21107					96.4286	13.9286	9.869
		141.923	12.6923	21.9231	20.8142	10.0177					101.538	11.5385	12.6923	13.0604	11.4219					114.643	12.8571	15	14.8007	10.5664					170.357	20.3571	9.608
											69.2308	10.3846	9.23077	10.6488	9.55154																7.394
											70.3846	11.5385	10.3846	10.5138	9.83538
											342.692	21.9231	26.5385	25.0385	20.1069
Vgat_031221_3 Cell size1								Vgat_031221_3 Cell size2								Vgat_031221_3 Cell size3
	cell	area	width- box	height- box	major	minor			cell	area	width- box	height- box	major	minor			cell	area	width- box	height- box	major	minor
	1	65	13	5	14.669	5.642			1	65	13	5	14.669	5.642			1	65	13	5	14.669	5.642
	2	49	7	9	8.9	7.01			2	78	12	9	11.357	8.745			2	42	8	7	8.011	6.675
	3	81	10	12	12.403	8.315			3	91	11	12	11.728	9.879			3	79	11	9	11.219	8.966
	4	80	10	10	10.425	9.771			4	79	9	13	12.508	8.042			4	82	13	9	12.029	8.679
	5	79	11	10	10.698	9.403			5	93	13	9	13.099	9.04			5	53	9	9	11.532	5.852
	6	82	10	12	11.919	8.76			6	66	10	8	10.126	8.299			6	49	7	8	8.385	7.441
	7	116	14	13	16.095	9.177			7	43	7	8	7.604	7.2			7	62	9	9	9.119	8.657
	8	83	9	12	11.524	9.171			8	93	13	9	13.099	9.04			8	55	9	8	9.538	7.342
	9	101	13	13	14.246	9.027			9	67	9	10	9.747	8.753			9	60	10	8	10.116	7.552
	10	114	11	14	13.732	10.57			10	75	12	9	11.349	8.414			10	41	8	9	9.683	5.391
	11	61	9	9	10.24	7.585			11	73	8	12	12.164	7.641			11	58	9	9	9.568	7.719
	12	67	9	10	10.013	8.52			12	74	10	9	10.577	8.908
	13	119	11	15	14.343	10.564			13	95	13	11	12.154	9.952
									14	80	9	12	11.99	8.495
									15	46	8	8	8.834	6.63
									16	121	11	16	14.561	10.581
									17	99	13	11	12.6	10.004
									18	58	10	10	9.596	7.696
									19	83	12	10	12.28	8.606
									20	83	13	9	12.896	8.195
									21	113	13	13	14.477	9.939
									22	119	13	13	13.283	11.407
									23	101	11	13	13.286	9.679
									24	91	11	11	11.002	10.531
									25	88	9	13	13.417	8.351																	minor
									26	117	13	16	14.745	10.103																	11.0121
									27	135	14	14	15.553	11.052																	9.39643
																															8.67
		56.5385	8.07692	10.3846	10.2692	8.08846				90	13.8462	10.3846	13.1042	10.0904				48.4615	9.23077	8.07692	9.24346	7.70192									11.7429
		93.4615	11.5385	13.8462	14.3112	9.59423				105	12.6923	13.8462	13.5323	11.3988				91.1538	12.6923	10.3846	12.945	10.3454									10.5739
		92.3077	11.5385	11.5385	12.0288	11.2742				91.1538	10.3846	15	14.4323	9.27923				94.6154	15	10.3846	13.8796	10.0142									10.2943
		91.1538	12.6923	11.5385	12.3438	10.8496				107.308	15	10.3846	15.1142	10.4308				61.1538	10.3846	10.3846	13.3062	6.75231									7.92214
		94.6154	11.5385	13.8462	13.7527	10.1077				76.1538	11.5385	9.23077	11.6838	9.57577				56.5385	8.07692	9.23077	9.675	8.58577
		133.846	16.1538	15	18.5712	10.5888				49.6154	8.07692	9.23077	8.77385	8.30769				71.5385	10.3846	10.3846	10.5219	9.98885
		95.7692	10.3846	13.8462	13.2969	10.5819				107.308	15	10.3846	15.1142	10.4308				63.4615	10.3846	9.23077	11.0054	8.47154
		116.538	15	15	16.4377	10.4158				77.3077	10.3846	11.5385	11.2465	10.0996				69.2308	11.5385	9.23077	11.6723	8.71385
		131.538	12.6923	16.1538	15.8446	12.1962				86.5385	13.8462	10.3846	13.095	9.70846				47.3077	9.23077	10.3846	11.1727	6.22038
		70.3846	10.3846	10.3846	11.8154	8.75192				84.2308	9.23077	13.8462	14.0354	8.81654				66.9231	10.3846	10.3846	11.04	8.90654
		77.3077	10.3846	11.5385	11.5535	9.83077				85.3846	11.5385	10.3846	12.2042	10.2785
		137.308	12.6923	17.3077	16.5496	12.1892				109.615	15	12.6923	14.0238	11.4831
										92.3077	10.3846	13.8462	13.8346	9.80192
										53.0769	9.23077	9.23077	10.1931	7.65
										139.615	12.6923	18.4615	16.8012	12.2088
										114.231	15	12.6923	14.5385	11.5431
										66.9231	11.5385	11.5385	11.0723	8.88
										95.7692	13.8462	11.5385	14.1692	9.93
										95.7692	15	10.3846	14.88	9.45577
										130.385	15	15	16.7042	11.4681
										137.308	15	15	15.3265	13.1619
										116.538	12.6923	15	15.33	11.1681
										105	12.6923	12.6923	12.6946	12.1512
										101.538	10.3846	15	15.4812	9.63577
										135	15	18.4615	17.0135	11.6573
										155.769	16.1538	16.1538	17.9458	12.7523
Vgat_040921_3IONTO Cell size1								Vgat_040921_3IONTO Cell size2								Vgat_040921_3IONTO Cell size2								Vgat_040921_3IONTO Cell size2
	cell	area	width- box	height- box	major	minor			cell	area	width- box	height- box	major	minor			cell	area	width- box	height- box	major	minor			cell	area	width- box	height- box	major	minor
	1	130	13	10	14.669	11.284			1	130	13	10	14.669	11.284			1	140	14	10	15.797	11.284			1	130	13	10	14.669	11.284
	2	79	10	10	10.68	9.418			2	121	13	15	12.838	12			2	141	14	15	14.068	12.761			2	131	11	15	15.097	11.048
	3	57	6	14	12.912	5.621			3	166	13	17	15.789	13.387			3	157	14	15	15.596	12.817			3	128	11	17	16.577	9.831
	4	103	12	11	12.259	10.698			4	238	23	16	20.763	14.595			4	181	16	18	17.693	13.026			4	149	11	16	15.925	11.913
	5	153	15	17	15.897	12.254			5	95	10	13	13.326	9.077			5	116	11	15	15.224	9.702			5	104	11	12	12.366	10.708
	6	105	13	12	12.342	10.832			6	129	12	15	13.99	11.74			6	141	11	18	17.158	10.463			6	76	12	10	11.371	8.51
	7	102	12	12	12.842	10.113			7	155	15	19	18.122	10.89			7	106	11	13	12.658	10.662									height- box	major	minor
	8	79	7	13	13.462	7.472			8	101	9	15	14.837	8.667			8	102	11	12	12.295	10.563									5	14.669	5.642
	9	137	12	19	17.127	10.185			9	117	13	12	13.772	10.817			9	96	13	12	14.895	8.206									14	12.607	7.676
	10	105	13	12	12.342	10.832			10	105	12	12	12.417	10.767			10	119	15	12	13.976	10.841									14	14.25	9.918
	11	125	13	14	15.475	10.284			11	102	12	13	12.679	10.243			11	103	12	12	12.9	10.166									9	9.893	8.751
									12	83	11	10	10.998	9.609			12	66	8	11	10.185	8.251									12	12.447	10.741
																	13	63	9	11	11.579	6.928									15	14.803	12.3
																															13	12.447	9.002
		91.1538	11.5385	11.5385	12.3231	10.8669				139.615	15	17.3077	14.8131	13.8462				151.071	15	16.0714	15.0729	13.6725				151.154	12.6923	17.3077	17.4196	12.7477	14	15.014	9.922
		65.7692	6.92308	16.1538	14.8985	6.48577				191.538	15	19.6154	18.2181	15.4465				168.214	15	16.0714	16.71	13.7325				147.692	12.6923	19.6154	19.1273	11.3435	12	11.291	8.344
		118.846	13.8462	12.6923	14.145	12.3438				274.615	26.5385	18.4615	23.9573	16.8404				193.929	17.1429	19.2857	18.9568	13.9564				171.923	12.6923	18.4615	18.375	13.7458	12	12.313	10.857
		176.538	17.3077	19.6154	18.3427	14.1392				109.615	11.5385	15	15.3762	10.4735				124.286	11.7857	16.0714	16.3114	10.395				120	12.6923	13.8462	14.2685	12.3554	14	15.215	12.72
		121.154	15	13.8462	14.2408	12.4985				148.846	13.8462	17.3077	16.1423	13.5462				151.071	11.7857	19.2857	18.3836	11.2104				87.6923	13.8462	11.5385	13.1204	9.81923	16	14.24	11.087
		117.692	13.8462	13.8462	14.8177	11.6688				178.846	17.3077	21.9231	20.91	12.5654				113.571	11.7857	13.9286	13.5621	11.4236									21	17.705	11.146
		91.1538	8.07692	15	15.5331	8.62154				116.538	10.3846	17.3077	17.1196	10.0004				109.286	11.7857	12.8571	13.1732	11.3175									13	12.782	9.264
		158.077	13.8462	21.9231	19.7619	11.7519				135	15	13.8462	15.8908	12.4812				102.857	13.9286	12.8571	15.9589	8.79214									13	15.012	8.566
		121.154	15	13.8462	14.2408	12.4985				121.154	13.8462	13.8462	14.3273	12.4235				127.5	16.0714	12.8571	14.9743	11.6154									12	12.339	11.248
		144.231	15	16.1538	17.8558	11.8662				117.692	13.8462	15	14.6296	11.8188				110.357	12.8571	12.8571	13.8214	10.8921									13	13.755	10.183
										95.7692	12.6923	11.5385	12.69	11.0873				70.7143	8.57143	11.7857	10.9125	8.84036									14	13.331	10.41
																		67.5	9.64286	11.7857	12.4061	7.42286									8	9.726	7.593
																															16.1538	14.5465	8.85692
																															16.1538	16.4423	11.4438
																															10.3846	11.415	10.0973
																															13.8462	14.3619	12.3935
																															17.3077	17.0804	14.1923
Per animal means																															15	14.3619	10.3869
13.3393	11.1242	12.4396	10.2692	12.3231		68.5714	71.5385	91.1538	56.5385	91.1538																					16.1538	17.3238	11.4485
12.7211	15.7731	12.6427	14.3111	14.8985		76.0714	128.077	87.6923	93.4615	65.7692																					13.8462	13.0281	9.62769
9.04393	10.2669	11.5512	12.0289	14.145		53.5714	58.8462	68.0769	92.3077	118.846																					13.8462	14.2073	12.5273
12.3696	12.0092	12.7027	12.3438	18.3427		83.5714	85.3846	100.385	91.1538	176.538																					16.1538	17.5558	14.6769
14.7975	14.3527	18.4165	13.7527	14.2408		105	114.231	98.0769	94.6154	121.154																					18.4615	16.4308	12.7927
12.9407	16.5946	12.2273	18.5711	14.8177		93.2143	100.385	88.8462	133.846	117.692																					24.2308	20.4288	12.8608
15.5121	11.5512	11.5419	13.2969	15.5331		121.071	85.3846	76.1538	95.7692	91.1538																					15	14.7485	10.6892
13.6468	16.8265	13.1792	16.4377	19.7619		121.071	131.538	106.154	116.538	158.077																					15	17.3215	9.88385
11.385	12.9427	10.2715	15.8446	14.2408		80.3571	94.6154	64.6154	131.538	121.154																					13.8462	14.2373	12.9785
12.8946	12.8631	18.4546	11.8154	17.8558		102.857	94.6154	131.538	70.3846	144.231																					15	15.8712	11.7496
14.2864	20.7104	18.1408	11.5535	14.8131		79.2857	183.462	125.769	77.3077	139.615																					16.1538	15.3819	12.0115
10.7036	17.1023	12.48	16.5496	18.2181		79.2857	126.923	80.7692	137.308	191.538																					9.23077	11.2223	8.76115
12.3964	14.7012	12.6012	13.1042	23.9573		81.4286	115.385	85.3846	90	274.615
17.1246	16.8669	20.8142	13.5323	15.3762		158.571	176.538	141.923	105	109.615
17.9679	17.565	13.0638	14.4323	16.1423		145.714	135	80.7692	91.1538	148.846
10.3425	20.5927	11.6931	15.1142	20.91		69.6429	153.462	77.3077	107.308	178.846
11.2704	15.6369	13.6777	11.6838	17.1196		70.7143	148.846	72.6923	76.1538	116.538
14.0432	19.5865	12.2054	8.77385	15.8908		102.857	144.231	72.6923	49.6154	135
12.6654	13.9362	11.6677	15.1142	14.3273		100.714	117.692	64.6154	107.308	121.154
17.5007	11.5465	14.2523	11.2465	14.6296		112.5	58.8462	115.385	77.3077	117.692
14.5575	22.5888	16.6685	13.095	12.69		128.571	255	161.538	86.5385	95.7692
15.1275	18.6231	14.7254	14.0354	15.0729		111.429	174.231	99.2308	84.2308	151.071
15.5068	13.6004	12.2908	12.2042	16.71		125.357	101.538	99.2308	85.3846	168.214																					height- box	major	minor
11.3657	20.8615	17.7692	14.0238	18.9568		72.8571	203.077	152.308	109.615	193.929																					5	15.797	5.642
14.5318	16.3304	14.6331	13.8346	16.3114		106.071	131.538	94.6154	92.3077	124.286																					9	9.063	7.867
14.3154	11.8892	15.3531	10.1931	18.3836		102.857	73.8462	88.8462	53.0769	151.071																					10	13.641	10.267
13.8568	13.0512	10.5138	16.8011	13.5621		109.286	80.7692	70.3846	139.615	113.571																					13	12.582	9.006
11.985	13.0512	13.0604	14.5385	13.1732		80.3571	80.7692	101.538	114.231	109.286																					13	13.3	8.808
15.9846	15.0231	10.6488	11.0723	15.9589		126.429	109.615	69.2308	66.9231	102.857																					16	15.338	9.464
11.3529	16.7862	10.5138	14.1692	14.9743		67.5	131.538	70.3846	95.7692	127.5																					12	11.866	8.477
15.6407	15.6035	25.0385	14.88	13.8214		122.143	86.5385	342.692	95.7692	110.357																					10	13.58	9.188
12.5169	15.0231	11.1407	16.7042	10.9125		91.1538	109.615	77.1429	130.385	70.7143																					9	10.57	7.348
16.5254	15.6508	13.0629	15.3265	12.4061		154.615	141.923	79.2857	137.308	67.5																					10	9.648	9.238
10.8138	15.8562	14.4396	15.33	17.4196		63.4615	151.154	97.5	116.538	151.154																					9	12.017	8.37
12.06	12.2908	10.5579	12.6946	19.1273		92.3077	65.7692	66.4286	105	147.692																					13	12.85	10.998
13.9592	14.8704	12.0182	15.4811	18.375		109.615	100.714	75	101.538	171.923																					10	11.579	9.127
12.8238	14.2264	13.7346	17.0135	14.2685		77.3077	100.714	93.2143	135	120																					10	12.506	9.163
9.75692	16.08	13.8289	17.9458	13.1204		56.5385	131.786	114.643	155.769	87.6923																					14	18.599	10.884
14.6746	10.3125	13.6125	9.24346			87.6923	64.2857	115.714	48.4615
12.0542	12.4618	12.9118	12.945			80.7692	84.6429	83.5714	91.1538
13.2231	20.6539	12.7104	13.8796			68.0769	198.214	81.4286	94.6154
15.4673	11.4889	10.5525	13.3062			93.4615	86.7857	58.9286	61.1538
11.3192	12.0686	13.6136	9.675			70.3846	101.786	85.7143	56.5385
20.28	16.8718	14.4396	10.5219			186.923	171.429	97.5	71.5385																						9.64286	9.71036	8.42893
12.1465	17.5457	14.8007	11.0054			83.0769	118.929	114.643	63.4615																						10.7143	14.6154	11.0004
12.6819	13.3221	9.71036	11.6723			83.0769	80.3571	60	69.2308																						13.9286	13.4807	9.64929
14.0354	13.8268	14.6154	11.1727			114.231	93.2143	117.857	47.3077																						13.9286	14.25	9.43714
15.5042	12.33	13.4807	11.04			126.923	110.357	95.3571	66.9231																						17.1429	16.4336	10.14
11.8246	20.76	14.25				90	187.5	98.5714																							12.8571	12.7136	9.0825
14.9919	18.6418	16.4336				109.615	181.071	122.143																							10.7143	14.55	9.84429
13.0592	15.8829	12.7136				99.2308	140.357	84.6429																							9.64286	11.325	7.87286
18.3635	22.1004	14.55				132.692	225	105																							10.7143	10.3371	9.89786
15.6946	19.6704	11.325				131.538	148.929	65.3571																							9.64286	12.8754	8.96786
12.225	15.0557	10.3371				84.2308	139.286	75																							13.9286	13.7679	11.7836
13.0592	18.5261	12.8754				99.2308	173.571	84.6429																							10.7143	12.4061	9.77893
16.3488	14.5768	13.7679				113.077	107.143	118.929																							10.7143	13.3993	9.8175
15.5665	17.2168	12.4061				140.769	180	88.9286																							15	19.9275	11.6614
13.9408	13.11	13.3993				100.385	105	96.4286
15.645	15.4157	19.9275				101.538	151.071	170.357
13.9408	14.5465					100.385	87.6923
15.5665	16.4423					140.769	128.077
13.4596	11.415					103.846	78.4615
15.4108	14.3619					109.615	121.154
17.7565	17.0804					117.692	165
16.5415	14.3619					140.769	101.538
10.4481	17.3238					68.0769	135
12.1835	13.0281					85.3846	85.3846
12.03	14.2073					78.4615	121.154
11.175	17.5558					78.2143	175.385
14.7321	16.4308					94.2857	143.077
11.8939	20.4288					88.9286	178.846
15.3793	14.7485					130.714	107.308
11.5071	17.3215					79.2857	116.538
11.7161	14.2373					92.1429	125.769
14.3625	15.8712					102.857	126.923
14.1557	15.3819					110.357	125.769
14.0089	11.2223					86.7857	66.9231
12.1768						87.8571
12.7082						68.5714
9.99964						60
13.1464						84.6429
12.9793						101.786
11.5961						78.2143
13.5386						69.6429
12.8464						77.1429
9.76286						56.7857
15.5679						109.286
17.7846						143.571
13.0661						90
11.6325						73.9286
14.1889						122.143
12.5786						97.5
22.2911						168.214
13.6521						79.2857
13.697	15.4774	13.6687	13.4079	15.8628		98.7021	124.598	98.3717	93.125	131.679

## Sheet: Vgat_IO
Vgat_CFIO_1_cellsize1							Vgat_CFIO_1_cellsize2							Vgat_CFIO_1_cellsize3							Vgat_CFIO_1_cellsize4							Vgat_CFIO_1_cellsize5
cell	area	width- box	height- box	major	minor		cell	area	width- box	height- box	major	minor		cell	area	width- box	height- box	major	minor		cell	area	width- box	height- box	major	minor		cell	area	width- box	height- box	major	minor
1	70	14	5	15.797	5.642		1	65	13	5	14.669	5.642		1	65	13	5	14.669	5.642		1	65	13	5	14.669	5.642		1	65	13	5	14.669	5.642
2	133	16	14	14.65	11.559		2	69	12	10	13.49	6.513		2	35	7	7	7.498	5.944		2	119	11	15	15.284	9.913		2	125	16	13	16.775	9.488
3	123	13	14	12.875	12.164		3	90	12	13	14.994	7.643		3	69	9	10	11.262	7.801		3	91	13	12	14.733	7.864		3	134	13	17	13.393	12.739
4	116	14	12	15.071	9.8		4	91	10	14	13.46	8.608		4	61	9	10	9.661	8.039		4	82	11	11	10.739	9.722		4	84	9	14	14.152	7.557
5	162	20	15	19.24	10.721		5	101	9	19	17.995	7.146		5	73	7	14	13.16	7.063		5	61	8	11	9.681	8.022		5	99	11	13	12.879	9.787
6	175	16	19	19.716	11.301		6	93	16	11	14.82	7.99		6	53	7	9	9.571	7.051		6	102	10	14	12.767	10.173		6	102	13	13	12.435	10.444
7	179	15	20	18.065	12.616		7	63	11	9	10.043	7.987		7	68	10	9	10.052	8.613		7	95	10	13	12.382	9.769		7	69	10	10	10.653	8.246
8	123	13	13	14.369	10.899		8	70	9	13	12.099	7.366		8	53	7	11	10.168	6.637		8	82	9	14	12.682	8.233
9	100	14	13	13.455	9.463		9	80	10	14	12.495	8.152		9	39	6	8	8.179	6.072		9	89	11	11	11.626	9.747
10	77	12	13	15.451	6.345		10	82	11	11	11.387	9.169									10	51	10	9	10.845	5.988
11	72	13	11	11.763	7.793		11	113	10	17	15.75	9.135									11	53	11	7	10.497	6.428
12	75	13	8	11.792	8.098		12	92	10	13	13.47	8.696
13	89	10	14	12.575	9.012		13	80	10	12	11.916	8.548		2	40.3846	8.07692	8.07692	8.65154	6.85846									2	144.231	18.4615	15	19.3558	10.9477
14	87	18	7	16.225	6.827		14	147	16	19	21.481	8.713		3	79.6154	10.3846	11.5385	12.9946	9.00115		2	137.308	12.6923	17.3077	17.6354	11.4381		3	154.615	15	19.6154	15.4535	14.6988
15	106	15	11	15.206	8.876		16	82	12	10	13.205	7.906		4	70.3846	10.3846	11.5385	11.1473	9.27577		3	105	15	13.8462	16.9996	9.07385		4	96.9231	10.3846	16.1538	16.3292	8.71962
							17	87	12	13	13.975	7.926		5	84.2308	8.07692	16.1538	15.1846	8.14962		4	94.6154	12.6923	12.6923	12.3912	11.2177		5	114.231	12.6923	15	14.8604	11.2927
							18	97	9	15	14.333	8.617		6	61.1538	8.07692	10.3846	11.0435	8.13577		5	70.3846	9.23077	12.6923	11.1704	9.25615		6	117.692	15	15	14.3481	12.0508
							19	90	10	12	12.417	9.229		7	78.4615	11.5385	10.3846	11.5985	9.93808		6	117.692	11.5385	16.1538	14.7312	11.7381		7	79.6154	11.5385	11.5385	12.2919	9.51462
2	142.5	17.1429	15	15.6964	12.3846		20	141	14	18	14.841	12.096		8	61.1538	8.07692	12.6923	11.7323	7.65808		7	109.615	11.5385	15	14.2869	11.2719
3	131.786	13.9286	15	13.7946	13.0329		21	141	14	14	14.459	12.416		9	45	6.92308	9.23077	9.43731	7.00615		8	94.6154	10.3846	16.1538	14.6331	9.49962
4	124.286	15	12.8571	16.1475	10.5		22	140	12	18	15.238	11.698									9	102.692	12.6923	12.6923	13.4146	11.2465
5	173.571	21.4286	16.0714	20.6143	11.4868		23	80	10	14	12.495	8.152									10	58.8462	11.5385	10.3846	12.5135	6.90923
6	187.5	17.1429	20.3571	21.1243	12.1082		24	88	10	12	11.866	9.443									11	61.1538	12.6923	8.07692	12.1119	7.41692
7	191.786	16.0714	21.4286	19.3554	13.5171		25	106	9	18	16.536	8.162
8	131.786	13.9286	13.9286	15.3954	11.6775		26	116	15	14	15.236	9.694
9	107.143	15	13.9286	14.4161	10.1389		27	116	12	25	17.087	8.644
10	82.5	12.8571	13.9286	16.5546	6.79821		28	55	10	8	10.204	6.863
11	77.1429	13.9286	11.7857	12.6032	8.34964		29	94	12	12	12.03	9.949
12	80.3571	13.9286	8.57143	12.6343	8.67643
13	95.3571	10.7143	15	13.4732	9.65571		2	79.6154	13.8462	11.5385	15.5654	7.515
14	93.2143	19.2857	7.5	17.3839	7.31464		3	103.846	13.8462	15	17.3008	8.81885
15	113.571	16.0714	11.7857	16.2921	9.51		4	105	11.5385	16.1538	15.5308	9.93231
							5	116.538	10.3846	21.9231	20.7635	8.24538
							6	107.308	18.4615	12.6923	17.1	9.21923
							7	72.6923	12.6923	10.3846	11.5881	9.21577
							8	80.7692	10.3846	15	13.9604	8.49923
							9	92.3077	11.5385	16.1538	14.4173	9.40615
							10	94.6154	12.6923	12.6923	13.1388	10.5796
							11	130.385	11.5385	19.6154	18.1731	10.5404
							12	106.154	11.5385	15	15.5423	10.0338
							13	92.3077	11.5385	13.8462	13.7492	9.86308
							14	169.615	18.4615	21.9231	24.7858	10.0535
							16	94.6154	13.8462	11.5385	15.2365	9.12231
							17	100.385	13.8462	15	16.125	9.14538
							18	111.923	10.3846	17.3077	16.5381	9.94269
							19	103.846	11.5385	13.8462	14.3273	10.6488
							20	162.692	16.1538	20.7692	17.1242	13.9569
							21	162.692	16.1538	16.1538	16.6835	14.3262
							22	161.538	13.8462	20.7692	17.5823	13.4977
							23	92.3077	11.5385	16.1538	14.4173	9.40615
							24	101.538	11.5385	13.8462	13.6915	10.8958
							25	122.308	10.3846	20.7692	19.08	9.41769
							26	133.846	17.3077	16.1538	17.58	11.1854
							27	133.846	13.8462	28.8462	19.7158	9.97385
							28	63.4615	11.5385	9.23077	11.7738	7.91885
							29	108.462	13.8462	13.8462	13.8808	11.4796
							Vgat_CFIO_2_cellsize2
							cell	area	width- box	height- box	major	minor
Vgat_CFIO_2_cellsize1							1	65	13	5	14.669	5.642		Vgat_CFIO_2_cellsize3							Vgat_CFIO_2_cellsize4							Vgat_CFIO_2_cellsize5
cell	area	width- box	height- box	major	minor		2	100	12	11	12.536	10.157		cell	area	width- box	height- box	major	minor		cell	area	width- box	height- box	major	minor		cell	area	width- box	height- box	major	minor
1	65	13	5	14.669	5.642		3	116	12	16	15.18	9.73		1	65	13	5	14.669	5.642		1	65	13	5	14.669	5.642		1	65	13	5	14.669	5.642
2	137	19	15	13.796	12.644		4	95	11	13	12.431	9.73		2	81	13	8	12.505	8.248		2	84	11	12	13.257	8.068		2	94	13	11	12.152	9.849
3	58	9	9	9.77	7.558		5	124	14	13	13.001	12.144		3	98	13	13	11.728	10.64		3	94	11	14	14.855	8.057		3	84	10	12	11.72	9.125
4	84	14	10	12.314	8.685		6	62	8	12	10.54	7.489		4	84	13	10	11.706	9.136		4	85	9	13	12.16	8.9		4	71	9	12	11.152	8.106
5	75	9	12	10.952	8.72		7	85	10	10	11.615	9.318		5	73	15	7	15.131	6.143		5	94	11	12	12.911	9.27		5	85	11	12	11.098	9.752
6	66	10	11	11.205	7.5		8	86	10	12	11.134	9.834		6	93	13	13	13.388	8.844		6	94	12	11	12.3	9.731		6	74	10	11	11.153	8.448
7	68	9	9	10.286	8.417		9	84	9	12	12.135	8.813		7	90	11	12	13.439	8.527		7	77	9	12	12.813	7.651		7	91	12	11	11.508	10.068
8	78	12	10	11.8	8.416		10	118	13	13	14.484	10.373		8	75	11	11	12.426	7.685		8	76	12	9	11.374	8.507		8	128	15	12	15.151	10.757
9	118	13	11	14.229	10.559		11	129	15	12	14.585	11.262		9	67	9	11	9.949	8.575		9	73	11	11	13.859	6.707		9	92	13	13	12.36	9.477
10	69	10	11	9.985	8.798		12	78	10	13	11.688	8.497									10	107	15	10	15.288	8.911		10	71	12	9	11.557	7.822
11	78	9	11	11.01	9.02		13	89	11	14	15.058	7.526									11	95	11	11	11.355	10.653		11	83	12	11	13.272	7.963
12	85	12	11	12.598	8.591		14	87	10	14	12.768	8.676									12	86	11	11	11.32	9.673		12	78	10	11	10.84	9.162
13	117	14	15	12.582	11.84		15	86	10	13	12.419	8.817									13	96	12	13	12.326	9.916		13	115	11	14	13.726	10.668
14	88	9	14	13.164	8.512		16	118	14	15	17.071	8.801		2	93.4615	15	9.23077	14.4288	9.51692		14	87	12	11	12.471	8.882		14	59	8	9	8.933	8.409
15	80	10	11	10.848	9.39		17	97	16	12	14.578	8.472		3	113.077	15	15	13.5323	12.2769		15	91	12	11	11.279	10.272
16	74	11	11	12.465	7.559		18	91	11	13	12.086	9.586		4	96.9231	15	11.5385	13.5069	10.5415		16	115	13	13	12.729	11.504
17	66	11	10	10.673	7.873		19	112	13	13	12.827	11.117		5	84.2308	17.3077	8.07692	17.4588	7.08808
18	99	12	11	12.477	10.103		20	132	12	18	15.844	10.608		6	107.308	15	15	15.4477	10.2046
19	80	11	13	11.272	9.037		21	93	10	13	12.479	9.489		7	103.846	12.6923	13.8462	15.5065	9.83885		2	96.9231	12.6923	13.8462	15.2965	9.30923		2	108.462	15	12.6923	14.0215	11.3642
20	58	9	10	9.029	8.179		22	126	14	15	16.052	9.994		8	86.5385	12.6923	12.6923	14.3377	8.86731		3	108.462	12.6923	16.1538	17.1404	9.29654		3	96.9231	11.5385	13.8462	13.5231	10.5288
21	52	10	7	10.125	6.539		23	73	9	10	11.065	8.4		9	77.3077	10.3846	12.6923	11.4796	9.89423		4	98.0769	10.3846	15	14.0308	10.2692		4	81.9231	10.3846	13.8462	12.8677	9.35308
							24	76	10	10	10.717	9.029									5	108.462	12.6923	13.8462	14.8973	10.6962		5	98.0769	12.6923	13.8462	12.8054	11.2523
							25	65	8	14	12.044	6.872									6	108.462	13.8462	12.6923	14.1923	11.2281		6	85.3846	11.5385	12.6923	12.8688	9.74769
																					7	88.8462	10.3846	13.8462	14.7842	8.82808		7	105	13.8462	12.6923	13.2785	11.6169
2	158.077	21.9231	17.3077	15.9185	14.5892																8	87.6923	13.8462	10.3846	13.1238	9.81577		8	147.692	17.3077	13.8462	17.4819	12.4119
3	66.9231	10.3846	10.3846	11.2731	8.72077																9	84.2308	12.6923	12.6923	15.9912	7.73885		9	106.154	15	15	14.2615	10.935
4	96.9231	16.1538	11.5385	14.2085	10.0212		2	115.385	13.8462	12.6923	14.4646	11.7196									10	123.462	17.3077	11.5385	17.64	10.2819		10	81.9231	13.8462	10.3846	13.335	9.02538
5	86.5385	10.3846	13.8462	12.6369	10.0615		3	133.846	13.8462	18.4615	17.5154	11.2269									11	109.615	12.6923	12.6923	13.1019	12.2919		11	95.7692	13.8462	12.6923	15.3138	9.18808
6	76.1538	11.5385	12.6923	12.9288	8.65385		4	109.615	12.6923	15	14.3435	11.2269									12	99.2308	12.6923	12.6923	13.0615	11.1612		12	90	11.5385	12.6923	12.5077	10.5715
7	78.4615	10.3846	10.3846	11.8685	9.71192		5	143.077	16.1538	15	15.0012	14.0123									13	110.769	13.8462	15	14.2223	11.4415		13	132.692	12.6923	16.1538	15.8377	12.3092
8	90	13.8462	11.5385	13.6154	9.71077		6	71.5385	9.23077	13.8462	12.1615	8.64115									14	100.385	13.8462	12.6923	14.3896	10.2485		14	68.0769	9.23077	10.3846	10.3073	9.70269
9	136.154	15	12.6923	16.4181	12.1835		7	98.0769	11.5385	11.5385	13.4019	10.7515									15	105	13.8462	12.6923	13.0142	11.8523
10	79.6154	11.5385	12.6923	11.5212	10.1515		8	99.2308	11.5385	13.8462	12.8469	11.3469									16	132.692	15	15	14.6873	13.2738
11	90	10.3846	12.6923	12.7038	10.4077		9	96.9231	10.3846	13.8462	14.0019	10.1688
12	98.0769	13.8462	12.6923	14.5362	9.91269		10	136.154	15	15	16.7123	11.9688
13	135	16.1538	17.3077	14.5177	13.6615		11	148.846	17.3077	13.8462	16.8288	12.9946
14	101.538	10.3846	16.1538	15.1892	9.82154		12	90	11.5385	15	13.4862	9.80423
15	92.3077	11.5385	12.6923	12.5169	10.8346		13	102.692	12.6923	16.1538	17.3746	8.68385
16	85.3846	12.6923	12.6923	14.3827	8.72192		14	100.385	11.5385	16.1538	14.7323	10.0108
17	76.1538	12.6923	11.5385	12.315	9.08423		15	99.2308	11.5385	15	14.3296	10.1735
18	114.231	13.8462	12.6923	14.3965	11.6573		16	136.154	16.1538	17.3077	19.6973	10.155
19	92.3077	12.6923	15	13.0062	10.4273		17	111.923	18.4615	13.8462	16.8208	9.77538
20	66.9231	10.3846	11.5385	10.4181	9.43731		18	105	12.6923	15	13.9454	11.0608
21	60	11.5385	8.07692	11.6827	7.545		19	129.231	15	15	14.8004	12.8273
							20	152.308	13.8462	20.7692	18.2815	12.24
							21	107.308	11.5385	15	14.3988	10.9488
							22	145.385	16.1538	17.3077	18.5215	11.5315
							23	84.2308	10.3846	11.5385	12.7673	9.69231
							24	87.6923	11.5385	11.5385	12.3658	10.4181
							25	75	9.23077	16.1538	13.8969	7.92923
							Vgat_CFIO_3_cellsize2
							cell	area	width- box	height- box	major	minor
Vgat_CFIO_3_cellsize1							1	65	13	5	14.669	5.642			Vgat_CFIO_3_cellsize3								Vgat_CFIO_3_cellsize4
cell	area	width- box	height- box	major	minor		2	113	10	18	17.484	8.229			cell	area	width- box	height- box	major	minor			cell	area	width- box	height- box	major	minor
1	65	13	5	14.669	5.642		3	91	11	12	11.327	10.229			1	65	13	5	14.669	5.642			1	65	13	5	14.669	5.642
2	129	13	18	17.611	9.326		4	114	10	16	14.763	9.832			2	97	11	12	12.272	10.064			2	137	26	11	20.588	8.473
3	115	10	17	15.964	9.172		5	90	14	11	12.086	9.481			3	104	10	16	13.871	9.546			3	111	13	12	14.085	10.034
4	117	10	14	15.501	9.61		6	93	12	15	13.432	8.815			4	121	14	15	12.526	12.299			4	132	18	13	14.189	11.845
5	111	13	11	13.131	10.763		7	56	9	10	8.854	8.053			5	121	12	14	13.573	11.351			5	98	12	18	13.409	9.306
6	68	11	8	11.682	7.412		8	94	12	12	12.403	9.649			6	113	15	14	14.922	9.642			6	92	13	10	12.136	9.652
7	41	6	9	8.484	6.153		9	83	13	10	11.717	9.019			7	141	21	12	19.3	9.302			7	87	17	8	15.881	6.975
8	38	8	6	8.264	5.855		10	102	15	11	14.034	9.254			8	112	15	11	14.732	9.68			8	124	13	15	14.513	10.878
9	50	8	9	8.901	7.152		11	78	10	11	10.106	9.827			9	136	16	13	15.3	11.318			9	113	15	11	15.808	9.102
10	66	10	9	10.182	8.253		12	66	10	9	10.482	8.017			10	134	15	12	14.686	11.617			10	74	11	9	10.963	8.595
11	54	9	9	10.326	6.659		13	77	10	11	11.65	8.415			11	107	11	13	12.657	10.764			11	102	16	9	15.044	8.633
12	61	10	8	10.412	7.459		14	76	11	10	12.408	7.799			12	121	16	11	15.202	10.134			12	76	10	10	10.365	9.336
13	55	10	8	9.431	7.426		15	156	16	17	15.035	13.211			13	100	10	13	12.63	10.081			13	98	12	11	12.814	9.738
14	104	14	12	13.982	9.47		16	66	12	7	12.545	6.698			14	115	12	12	12.92	11.333			14	60	10	9	9.115	8.381
15	96	10	12	12.569	9.725		17	74	11	10	12.835	7.341			15	80	11	11	12.228	8.33			15	92	10	12	11.4	10.275
16	67	10	9	10.507	8.119		18	115	15	12	13.863	10.562			16	53	9	8	9.613	7.02			16	70	11	10	11.929	7.471
17	77	12	10	11.894	8.243		19	83	12	11	11.559	9.142			17	83	12	10	11.256	9.389			17	102	13	11	12.64	10.275
18	53	8	9	9.249	7.296		20	65	10	9	10.776	7.68			18	90	11	12	12.915	8.873			18	79	17	8	16.353	6.151
19	93	14	11	13.409	8.831		21	126	20	10	18.222	8.804			19	75	12	9	11.708	8.156			19	97	13	13	13.297	9.288
20	68	10	9	10.206	8.483		22	92	15	10	12.897	9.083			20	51	9	8	9.001	7.214			20	89	14	10	12.769	8.875
21	75	12	10	11.195	8.53		23	72	10	10	9.822	9.333			21	73	11	9	10.58	8.785			21	79	13	9	12.318	8.166
22	96	10	12	12.569	9.725		24	89	14	13	13.495	8.397			22	59	10	8	9.956	7.545			22	73	11	9	11.154	8.333
23	69	11	11	10.889	8.068										23	54	8	8	8.379	8.206			23	43	9	7	8.973	6.102
24	110	18	10	15.762	8.885										24	82	10	12	10.685	9.771			24	59	9	9	9.038	8.312
25	115	14	12	13.09	11.186										25	81	15	8	13.781	7.484			25	72	13	8	13.057	7.021
26	94	12	13	11.788	10.153										26	61	11	8	10.919	7.113
27	72	10	10	11.061	8.288										27	72	12	9	12.066	7.597
							2	130.385	11.5385	20.7692	20.1738	9.495			28	53	12	7	11.76	5.738
							3	105	12.6923	13.8462	13.0696	11.8027
2	148.846	15	20.7692	20.3204	10.7608		4	131.538	11.5385	18.4615	17.0342	11.3446			2	111.923	12.6923	13.8462	14.16	11.6123			2	158.077	30	12.6923	23.7554	9.77654
3	132.692	11.5385	19.6154	18.42	10.5831		5	103.846	16.1538	12.6923	13.9454	10.9396			3	120	11.5385	18.4615	16.005	11.0146			3	128.077	15	13.8462	16.2519	11.5777
4	135	11.5385	16.1538	17.8858	11.0885		6	107.308	13.8462	17.3077	15.4985	10.1712			4	139.615	16.1538	17.3077	14.4531	14.1912			4	152.308	20.7692	15	16.3719	13.6673
5	128.077	15	12.6923	15.1512	12.4188		7	64.6154	10.3846	11.5385	10.2162	9.29192			5	139.615	13.8462	16.1538	15.6612	13.0973			5	113.077	13.8462	20.7692	15.4719	10.7377
6	78.4615	12.6923	9.23077	13.4792	8.55231		8	108.462	13.8462	13.8462	14.3112	11.1335			6	130.385	17.3077	16.1538	17.2177	11.1254			6	106.154	15	11.5385	14.0031	11.1369
7	47.3077	6.92308	10.3846	9.78923	7.09962		9	95.7692	15	11.5385	13.5196	10.4065			7	162.692	24.2308	13.8462	22.2692	10.7331			7	100.385	19.6154	9.23077	18.3242	8.04808
8	43.8462	9.23077	6.92308	9.53538	6.75577		10	117.692	17.3077	12.6923	16.1931	10.6777			8	129.231	17.3077	12.6923	16.9985	11.1692			8	143.077	15	17.3077	16.7458	12.5515
9	57.6923	9.23077	10.3846	10.2704	8.25231		11	90	11.5385	12.6923	11.6608	11.3388			9	156.923	18.4615	15	17.6538	13.0592			9	130.385	17.3077	12.6923	18.24	10.5023
10	76.1538	11.5385	10.3846	11.7485	9.52269		12	76.1538	11.5385	10.3846	12.0946	9.25038			10	154.615	17.3077	13.8462	16.9454	13.4042			10	85.3846	12.6923	10.3846	12.6496	9.91731
11	62.3077	10.3846	10.3846	11.9146	7.68346		13	88.8462	11.5385	12.6923	13.4423	9.70962			11	123.462	12.6923	15	14.6042	12.42			11	117.692	18.4615	10.3846	17.3585	9.96115
12	70.3846	11.5385	9.23077	12.0138	8.60654		14	87.6923	12.6923	11.5385	14.3169	8.99885			12	139.615	18.4615	12.6923	17.5408	11.6931			12	87.6923	11.5385	11.5385	11.9596	10.7723
13	63.4615	11.5385	9.23077	10.8819	8.56846		15	180	18.4615	19.6154	17.3481	15.2435			13	115.385	11.5385	15	14.5731	11.6319			13	113.077	13.8462	12.6923	14.7854	11.2362
14	120	16.1538	13.8462	16.1331	10.9269		16	76.1538	13.8462	8.07692	14.475	7.72846			14	132.692	13.8462	13.8462	14.9077	13.0765			14	69.2308	11.5385	10.3846	10.5173	9.67038
15	110.769	11.5385	13.8462	14.5027	11.2212		17	85.3846	12.6923	11.5385	14.8096	8.47038			15	92.3077	12.6923	12.6923	14.1092	9.61154			15	106.154	11.5385	13.8462	13.1538	11.8558
16	77.3077	11.5385	10.3846	12.1235	9.36808		18	132.692	17.3077	13.8462	15.9958	12.1869			16	61.1538	10.3846	9.23077	11.0919	8.1			16	80.7692	12.6923	11.5385	13.7642	8.62038
17	88.8462	13.8462	11.5385	13.7238	9.51115		19	95.7692	13.8462	12.6923	13.3373	10.5485			17	95.7692	13.8462	11.5385	12.9877	10.8335			17	117.692	15	12.6923	14.5846	11.8558
18	61.1538	9.23077	10.3846	10.6719	8.41846		20	75	11.5385	10.3846	12.4338	8.86154			18	103.846	12.6923	13.8462	14.9019	10.2381			18	91.1538	19.6154	9.23077	18.8688	7.09731
19	107.308	16.1538	12.6923	15.4719	10.1896		21	145.385	23.0769	11.5385	21.0254	10.1585			19	86.5385	13.8462	10.3846	13.5092	9.41077			19	111.923	15	15	15.3427	10.7169
20	78.4615	11.5385	10.3846	11.7762	9.78808		22	106.154	17.3077	11.5385	14.8812	10.4804			20	58.8462	10.3846	9.23077	10.3858	8.32385			20	102.692	16.1538	11.5385	14.7335	10.2404
21	86.5385	13.8462	11.5385	12.9173	9.84231		23	83.0769	11.5385	11.5385	11.3331	10.7688			21	84.2308	12.6923	10.3846	12.2077	10.1365			21	91.1538	15	10.3846	14.2131	9.42231
22	110.769	11.5385	13.8462	14.5027	11.2212		24	102.692	16.1538	15	15.5712	9.68885			22	68.0769	11.5385	9.23077	11.4877	8.70577			22	84.2308	12.6923	10.3846	12.87	9.615
23	79.6154	12.6923	12.6923	12.5642	9.30923										23	62.3077	9.23077	9.23077	9.66808	9.46846			23	49.6154	10.3846	8.07692	10.3535	7.04077
24	126.923	20.7692	11.5385	18.1869	10.2519										24	94.6154	11.5385	13.8462	12.3288	11.2742			24	68.0769	10.3846	10.3846	10.4285	9.59077
25	132.692	16.1538	13.8462	15.1038	12.9069										25	93.4615	17.3077	9.23077	15.9012	8.63538			25	83.0769	15	9.23077	15.0658	8.10115
26	108.462	13.8462	15	13.6015	11.715										26	70.3846	12.6923	9.23077	12.5988	8.20731
27	83.0769	11.5385	11.5385	12.7627	9.56308										27	83.0769	13.8462	10.3846	13.9223	8.76577
															28	61.1538	13.8462	8.07692	13.5692	6.62077
Vgat_CFIO_110320_1 cellsize1							Vgat_CFIO_110320_1 cellsize2							Vgat_CFIO_110320_1 cellsize3							Vgat_CFIO_110320_1 cellsize4							Vgat_CFIO_110320_1 cellsize5
cell	area	width- box	height- box	major	minor		cell	area	width- box	height- box	major	minor		cell	area	width- box	height- box	major	minor		cell	area	width- box	height- box	major	minor		cell	area	width- box	height- box	major	minor
1	65	13	5	14.669	5.642		1	65	13	5	14.669	5.642		1	65	13	5	14.669	5.642		1	65	13	5	14.669	5.642		1	65	13	5	14.669	5.642
2	82	14	9	15.336	6.808		2	130	16	12	15.011	11.027		2	117	15	12	13.638	10.923		2	78	13	8	12.766	7.779		2	107	13	14	15.043	9.056
3	75	13	8	12.604	7.576		3	107	12	11	12.146	11.216		3	40	8	7	7.675	6.636		3	79	12	9	12.052	8.346		3	78	9	12	11.553	8.596
4	58	11	7	10.395	7.104		4	105	16	11	14.467	9.241		4	117	15	12	13.638	10.923		4	56	10	9	10.087	7.068		4	97	15	12	13.554	9.112
5	80	11	10	10.788	9.442		5	73	11	9	10.708	8.68		5	79	10	12	12.864	7.819		5	104	15	13	14.735	8.986		5	64	10	9	9.861	8.264
6	52	7	9	9.22	7.181		6	95	10	13	12.8	9.45		6	44	6	9	10.09	5.552		6	89	11	12	11.728	9.662		6	87	10	13	12.697	8.724
7	103	15	11	14.041	9.34		7	111	9	16	15.38	9.189		7	75	10	9	10.914	8.75		7	84	11	13	12.852	8.322		7	85	9	12	11.966	9.045
							8	96	12	13	12.242	9.984		8	77	9	12	12.202	8.034		8	105	13	11	12.894	10.368		8	63	9	9	9.472	8.469
							9	63	10	9	10.02	8.005		9	263	17	24	22.84	14.661		9	147	15	18	16.532	11.321		9	61	8	11	9.821	7.908
							10	69	10	10	11.973	7.338		10	68	10	9	9.818	8.818		10	144	30	11	20.358	9.006		10	66	8	9	9.669	8.691
							11	81	9	13	12.346	8.353		11	55	8	9	9.771	7.167		11	66	10	9	9.714	8.651		11	79	10	10	10.614	9.476
							12	80	10	12	11.654	8.74		12	60	10	8	10.092	7.57		12	82	9	11	11.972	8.721		12	74	9	11	11.078	8.505
							13	80	11	11	12.231	8.328		13	56	12	7	11.228	6.351		13	76	12	8	12.065	8.021		13	134	13	15	14.567	11.712
							14	76	13	9	12.998	7.445		14	78	10	9	10.936	9.081		14	88	11	10	12.155	9.218		14	85	10	12	11.071	9.776
							15	118	14	12	13.097	11.472		15	77	10	10	10.16	9.65		15	83	11	10	10.912	9.685		15	89	10	13	11.36	9.975
							16	66	9	9	9.621	8.734		16	63	11	8	11.143	7.198		16	88	12	11	11.274	9.938		16	88	12	10	12.064	9.287
							17	64	9	9	9.428	8.643		17	54	10	7	9.802	7.014		17	108	12	13	14.094	9.757		17	76	10	11	10.404	9.301
							18	57	8	10	10.995	6.601		18	65	11	9	9.841	8.41		18	88	15	11	15.959	7.021		18	67	10	9	9.975	8.552
							19	57	10	9	9.996	7.26		19	118	14	11	15.671	9.588		19	103	15	11	13.422	9.771		19	89	14	9	12.842	8.824
														20	79	8	12	12.337	8.153									20	64	10	9	11.103	7.339
														21	60	9	10	9.176	8.325									21	74	12	8	12.629	7.46
														22	89	9	14	13.541	8.368
														23	59	9	9	9.777	7.684
	94.6154	16.1538	10.3846	17.6954	7.85538			150	18.4615	13.8462	17.3204	12.7235			135	17.3077	13.8462	15.7362	12.6035			90	15	9.23077	14.73	8.97577			123.462	15	16.1538	17.3573	10.4492
	86.5385	15	9.23077	14.5431	8.74154			123.462	13.8462	12.6923	14.0146	12.9415			46.1538	9.23077	8.07692	8.85577	7.65692			91.1538	13.8462	10.3846	13.9062	9.63			90	10.3846	13.8462	13.3304	9.91846
	66.9231	12.6923	8.07692	11.9942	8.19692			121.154	18.4615	12.6923	16.6927	10.6627			135	17.3077	13.8462	15.7362	12.6035			64.6154	11.5385	10.3846	11.6388	8.15538			111.923	17.3077	13.8462	15.6392	10.5138
	92.3077	12.6923	11.5385	12.4477	10.8946			84.2308	12.6923	10.3846	12.3554	10.0154			91.1538	11.5385	13.8462	14.8431	9.02192			120	17.3077	15	17.0019	10.3685			73.8462	11.5385	10.3846	11.3781	9.53538
	60	8.07692	10.3846	10.6385	8.28577			109.615	11.5385	15	14.7692	10.9038			50.7692	6.92308	10.3846	11.6423	6.40615			102.692	12.6923	13.8462	13.5323	11.1485			100.385	11.5385	15	14.6504	10.0662
	118.846	17.3077	12.6923	16.2012	10.7769			128.077	10.3846	18.4615	17.7462	10.6027			86.5385	11.5385	10.3846	12.5931	10.0962			96.9231	12.6923	15	14.8292	9.60231			98.0769	10.3846	13.8462	13.8069	10.4365
								110.769	13.8462	15	14.1254	11.52			88.8462	10.3846	13.8462	14.0792	9.27			121.154	15	12.6923	14.8777	11.9631			72.6923	10.3846	10.3846	10.9292	9.77192
								72.6923	11.5385	10.3846	11.5615	9.23654			303.462	19.6154	27.6923	26.3538	16.9165			169.615	17.3077	20.7692	19.0754	13.0627			70.3846	9.23077	12.6923	11.3319	9.12462
								79.6154	11.5385	11.5385	13.815	8.46692			78.4615	11.5385	10.3846	11.3285	10.1746			166.154	34.6154	12.6923	23.49	10.3915			76.1538	9.23077	10.3846	11.1565	10.0281
								93.4615	10.3846	15	14.2454	9.63808			63.4615	9.23077	10.3846	11.2742	8.26962			76.1538	11.5385	10.3846	11.2085	9.98192			91.1538	11.5385	11.5385	12.2469	10.9338
								92.3077	11.5385	13.8462	13.4469	10.0846			69.2308	11.5385	9.23077	11.6446	8.73462			94.6154	10.3846	12.6923	13.8138	10.0627			85.3846	10.3846	12.6923	12.7823	9.81346
								92.3077	12.6923	12.6923	14.1127	9.60923			64.6154	13.8462	8.07692	12.9554	7.32808			87.6923	13.8462	9.23077	13.9212	9.255			154.615	15	17.3077	16.8081	13.5138
								87.6923	15	10.3846	14.9977	8.59038			90	11.5385	10.3846	12.6185	10.4781			101.538	12.6923	11.5385	14.025	10.6362			98.0769	11.5385	13.8462	12.7742	11.28
								136.154	16.1538	13.8462	15.1119	13.2369			88.8462	11.5385	11.5385	11.7231	11.1346			95.7692	12.6923	11.5385	12.5908	11.175			102.692	11.5385	15	13.1077	11.5096
								76.1538	10.3846	10.3846	11.1012	10.0777			72.6923	12.6923	9.23077	12.8573	8.30538			101.538	13.8462	12.6923	13.0085	11.4669			101.538	13.8462	11.5385	13.92	10.7158
								73.8462	10.3846	10.3846	10.8785	9.97269			62.3077	11.5385	8.07692	11.31	8.09308			124.615	13.8462	15	16.2623	11.2581			87.6923	11.5385	12.6923	12.0046	10.7319
								65.7692	9.23077	11.5385	12.6865	7.61654			75	12.6923	10.3846	11.355	9.70385			101.538	17.3077	12.6923	18.4142	8.10115			77.3077	11.5385	10.3846	11.5096	9.86769
								65.7692	11.5385	10.3846	11.5338	8.37692			136.154	16.1538	12.6923	18.0819	11.0631			118.846	17.3077	12.6923	15.4869	11.2742			102.692	16.1538	10.3846	14.8177	10.1815
															91.1538	9.23077	13.8462	14.235	9.40731										73.8462	11.5385	10.3846	12.8112	8.46808
															69.2308	10.3846	11.5385	10.5877	9.60577										85.3846	13.8462	9.23077	14.5719	8.60769
															102.692	10.3846	16.1538	15.6242	9.65538
															68.0769	10.3846	10.3846	11.2812	8.86615
Vgat_CFIO_110320_2 cellsize5							Vgat_CFIO_110320_2 cellsize2							Vgat_CFIO_110320_2 cellsize3							Vgat_CFIO_110320_2 cellsize4
cell	area	width- box	height- box	major	minor		cell	area	width- box	height- box	major	minor		cell	area	width- box	height- box	major	minor		cell	area	width- box	height- box	major	minor
1	65	13	5	14.669	5.642		1	65	13	5	14.669	5.642		1	65	13	5	14.669	5.642		1	65	13	5	14.669	5.642
2	61	9	10	9.887	7.855		2	119	13	13	14.783	10.249		2	112	11	13	13.083	10.9		2	71	9	10	10.326	8.755
3	88	11	13	14.781	7.58		3	90	11	11	12.708	9.017		3	89	10	12	11.986	9.454		3	95	12	11	13.046	9.272
4	84	14	10	12.849	8.324		4	132	17	12	16.155	10.403		4	103	11	13	12.743	10.292		4	108	13	13	16.172	8.503
5	63	9	10	10.223	7.847		5	163	15	16	16.96	12.237		5	117	13	13	13.118	11.356		5	77	11	9	11.107	8.827
6	120	16	13	18.618	8.207		6	140	14	16	14.981	11.898		6	91	12	10	12.214	9.486		6	133	12	16	16.358	10.352
7	80	12	10	11.226	9.073		7	140	12	16	16.662	10.698		7	115	11	13	12.922	11.331		7	88	13	10	12.234	9.159
8	50	10	6	10.045	6.338		8	156	12	17	17.224	11.532		8	112	13	12	12.452	11.452		8	116	17	10	15.847	9.32
9	70	9	11	10.219	8.722		9	140	12	15	15.076	11.824		9	111	11	13	12.528	11.281		9	118	14	14	12.995	11.562
10	64	11	10	11.246	7.246		10	189	21	17	17.676	13.614		10	87	11	11	11.556	9.585		10	52	8	8	8.452	7.834
11	65	10	10	9.353	8.849		11	98	11	11	12.724	9.806		11	78	10	10	11.54	8.606		11	52	10	8	9.503	6.967
							12	73	9	10	10.474	8.874		12	53	8	9	9.424	7.161
							13	100	13	10	13.1	9.719		13	102	11	12	12.816	10.134
							14	73	9	10	10.474	8.874		14	81	10	11	11.337	9.097
							15	106	13	11	13.413	10.062		15	112	15	12	13.262	10.753
							16	65	10	8	9.84	8.41		16	109	14	12	13.056	10.629
							17	121	12	14	14.295	10.778		17	71	11	9	12.211	7.403
							18	104	10	15	14.823	8.933		18	63	10	8	10.641	7.538
							19	71	11	8	11.059	8.175		19	58	10	8	9.746	7.577
							20	64	9	9	9.166	8.89		20	133	16	14	18.212	9.298
							21	81	11	11	10.881	9.478		21	79	10	10	10.777	9.333
							22	121	12	14	14.295	10.778		22	97	12	11	11.654	10.598
							23	104	10	15	14.823	8.933		23	110	14	12	14.184	9.874
							24	88	11	10	11.977	9.355		24	108	10	15	14.678	9.368
							25	81	11	11	10.881	9.478		25	112	14	11	14.068	10.137
							26	67	10	10	10.076	8.466		26	69	12	8	10.962	8.014
							27	90	14	8	14.33	7.997		27	85	13	9	12.254	8.832
							28	83	13	8	13.469	7.846		28	103	15	10	14.456	9.072
							29	63	8	10	10.725	7.479
	70.3846	10.3846	11.5385	11.4081	9.06346			137.308	15	15	17.0573	11.8258			129.231	12.6923	15	15.0958	12.5769			81.9231	10.3846	11.5385	11.9146	10.1019
	101.538	12.6923	15	17.055	8.74615			103.846	12.6923	12.6923	14.6631	10.4042			102.692	11.5385	13.8462	13.83	10.9085			109.615	13.8462	12.6923	15.0531	10.6985
	96.9231	16.1538	11.5385	14.8258	9.60462			152.308	19.6154	13.8462	18.6404	12.0035			118.846	12.6923	15	14.7035	11.8754			124.615	15	15	18.66	9.81115
	72.6923	10.3846	11.5385	11.7958	9.05423			188.077	17.3077	18.4615	19.5692	14.1196			135	15	15	15.1362	13.1031			88.8462	12.6923	10.3846	12.8158	10.185
	138.462	18.4615	15	21.4823	9.46962			161.538	16.1538	18.4615	17.2858	13.7285			105	13.8462	11.5385	14.0931	10.9454			153.462	13.8462	18.4615	18.8746	11.9446
	92.3077	13.8462	11.5385	12.9531	10.4688			161.538	13.8462	18.4615	19.2254	12.3438			132.692	12.6923	15	14.91	13.0742			101.538	15	11.5385	14.1162	10.5681
	57.6923	11.5385	6.92308	11.5904	7.31308			180	13.8462	19.6154	19.8738	13.3062			129.231	15	13.8462	14.3677	13.2138			133.846	19.6154	11.5385	18.285	10.7538
	80.7692	10.3846	12.6923	11.7912	10.0638			161.538	13.8462	17.3077	17.3954	13.6431			128.077	12.6923	15	14.4554	13.0165			136.154	16.1538	16.1538	14.9942	13.3408
	73.8462	12.6923	11.5385	12.9762	8.36077			218.077	24.2308	19.6154	20.3954	15.7085			100.385	12.6923	12.6923	13.3338	11.0596			60	9.23077	9.23077	9.75231	9.03923
	75	11.5385	11.5385	10.7919	10.2104			113.077	12.6923	12.6923	14.6815	11.3146			90	11.5385	11.5385	13.3154	9.93			60	11.5385	9.23077	10.965	8.03885
								84.2308	10.3846	11.5385	12.0854	10.2392			61.1538	9.23077	10.3846	10.8738	8.26269
								115.385	15	11.5385	15.1154	11.2142			117.692	12.6923	13.8462	14.7877	11.6931
								84.2308	10.3846	11.5385	12.0854	10.2392			93.4615	11.5385	12.6923	13.0812	10.4965
								122.308	15	12.6923	15.4765	11.61			129.231	17.3077	13.8462	15.3023	12.4073
								75	11.5385	9.23077	11.3538	9.70385			125.769	16.1538	13.8462	15.0646	12.2642
								139.615	13.8462	16.1538	16.4942	12.4362			81.9231	12.6923	10.3846	14.0896	8.54192
								120	11.5385	17.3077	17.1035	10.3073			72.6923	11.5385	9.23077	12.2781	8.69769
								81.9231	12.6923	9.23077	12.7604	9.43269			66.9231	11.5385	9.23077	11.2454	8.74269
								73.8462	10.3846	10.3846	10.5762	10.2577			153.462	18.4615	16.1538	21.0138	10.7285
								93.4615	12.6923	12.6923	12.555	10.9362			91.1538	11.5385	11.5385	12.435	10.7688
								139.615	13.8462	16.1538	16.4942	12.4362			111.923	13.8462	12.6923	13.4469	12.2285
								120	11.5385	17.3077	17.1035	10.3073			126.923	16.1538	13.8462	16.3662	11.3931
								101.538	12.6923	11.5385	13.8196	10.7942			124.615	11.5385	17.3077	16.9362	10.8092
								93.4615	12.6923	12.6923	12.555	10.9362			129.231	16.1538	12.6923	16.2323	11.6965
								77.3077	11.5385	11.5385	11.6262	9.76846			79.6154	13.8462	9.23077	12.6485	9.24692
								103.846	16.1538	9.23077	16.5346	9.22731			98.0769	15	10.3846	14.1392	10.1908
								95.7692	15	9.23077	15.5412	9.05308			118.846	17.3077	11.5385	16.68	10.4677
								72.6923	9.23077	11.5385	12.375	8.62962
Per animal means
15.6964	15.9185	20.3204	17.6954	11.4081			142.5	158.077	148.846	94.6154	70.3846
13.7946	11.2731	18.42	14.5431	17.055			131.786	66.9231	132.692	86.5385	101.538
16.1475	14.2085	17.8858	11.9942	14.8258			124.286	96.9231	135	66.9231	96.9231
20.6143	12.6369	15.1511	12.4477	11.7958			173.571	86.5385	128.077	92.3077	72.6923
21.1243	12.9289	13.4792	10.6385	21.4823			187.5	76.1538	78.4615	60	138.462
19.3554	11.8685	9.78923	16.2011	12.9531			191.786	78.4615	47.3077	118.846	92.3077
15.3954	13.6154	9.53538	17.3204	11.5904			131.786	90	43.8462	150	57.6923
14.4161	16.4181	10.2704	14.0146	11.7912			107.143	136.154	57.6923	123.462	80.7692
16.5546	11.5212	11.7485	16.6927	12.9762			82.5	79.6154	76.1538	121.154	73.8462
12.6032	12.7038	11.9146	12.3554	10.7919			77.1429	90	62.3077	84.2308	75
12.6343	14.5361	12.0138	14.7692	17.0573			80.3571	98.0769	70.3846	109.615	137.308
13.4732	14.5177	10.8819	17.7462	14.6631			95.3571	135	63.4615	128.077	103.846
17.3839	15.1892	16.1331	14.1254	18.6404			93.2143	101.538	120	110.769	152.308
16.2921	12.5169	14.5027	11.5615	19.5692			113.571	92.3077	110.769	72.6923	188.077
15.5654	14.3827	12.1235	13.815	17.2858			79.6154	85.3846	77.3077	79.6154	161.538
17.3008	12.315	13.7239	14.2454	19.2254			103.846	76.1538	88.8462	93.4615	161.538
15.5308	14.3965	10.6719	13.4469	19.8739			105	114.231	61.1538	92.3077	180
20.7635	13.0061	15.4719	14.1127	17.3954			116.538	92.3077	107.308	92.3077	161.538
17.1	10.4181	11.7761	14.9977	20.3954			107.308	66.9231	78.4615	87.6923	218.077
11.5881	11.6827	12.9173	15.1119	14.6815			72.6923	60	86.5385	136.154	113.077
13.9604	14.4646	14.5027	11.1012	12.0854			80.7692	115.385	110.769	76.1538	84.2308
14.4173	17.5154	12.5642	10.8785	15.1154			92.3077	133.846	79.6154	73.8462	115.385
13.1388	14.3435	18.1869	12.6865	12.0854			94.6154	109.615	126.923	65.7692	84.2308
18.1731	15.0012	15.1038	11.5338	15.4765			130.385	143.077	132.692	65.7692	122.308
15.5423	12.1615	13.6015	15.7362	11.3538			106.154	71.5385	108.462	135	75
13.7492	13.4019	12.7627	8.85577	16.4942			92.3077	98.0769	83.0769	46.1538	139.615
24.7858	12.8469	20.1739	15.7362	17.1035			169.615	99.2308	130.385	135	120
15.2365	14.0019	13.0696	14.8431	12.7604			94.6154	96.9231	105	91.1538	81.9231
16.125	16.7123	17.0342	11.6423	10.5762			100.385	136.154	131.538	50.7692	73.8462
16.5381	16.8288	13.9454	12.5931	12.555			111.923	148.846	103.846	86.5385	93.4615
14.3273	13.4862	15.4985	14.0792	16.4942			103.846	90	107.308	88.8462	139.615
17.1242	17.3746	10.2162	26.3539	17.1035			162.692	102.692	64.6154	303.462	120
16.6835	14.7323	14.3111	11.3285	13.8196			162.692	100.385	108.462	78.4615	101.538
17.5823	14.3296	13.5196	11.2742	12.555			161.538	99.2308	95.7692	63.4615	93.4615
14.4173	19.6973	16.1931	11.6446	11.6262			92.3077	136.154	117.692	69.2308	77.3077
13.6915	16.8208	11.6608	12.9554	16.5346			101.538	111.923	90	64.6154	103.846
19.08	13.9454	12.0946	12.6185	15.5412			122.308	105	76.1538	90	95.7692
17.58	14.8004	13.4423	11.7231	12.375			133.846	129.231	88.8462	88.8462	72.6923
19.7158	18.2815	14.3169	12.8573	15.0958			133.846	152.308	87.6923	72.6923	129.231
11.7738	14.3988	17.3481	11.31	13.83			63.4615	107.308	180	62.3077	102.692
13.8808	18.5215	14.475	11.355	14.7035			108.462	145.385	76.1538	75	118.846
8.65154	12.7673	14.8096	18.0819	15.1362			40.3846	84.2308	85.3846	136.154	135
12.9946	12.3658	15.9958	14.235	14.0931			79.6154	87.6923	132.692	91.1538	105
11.1473	13.8969	13.3373	10.5877	14.91			70.3846	75	95.7692	69.2308	132.692
15.1846	14.4289	12.4338	15.6242	14.3677			84.2308	93.4615	75	102.692	129.231
11.0435	13.5323	21.0254	11.2812	14.4554			61.1538	113.077	145.385	68.0769	128.077
11.5985	13.5069	14.8811	14.73	13.3338			78.4615	96.9231	106.154	90	100.385
11.7323	17.4589	11.3331	13.9062	13.3154			61.1538	84.2308	83.0769	91.1538	90
9.43731	15.4477	15.5711	11.6388	10.8738			45	107.308	102.692	64.6154	61.1538
17.6354	15.5065	14.16	17.0019	14.7877			137.308	103.846	111.923	120	117.692
16.9996	14.3377	16.005	13.5323	13.0811			105	86.5385	120	102.692	93.4615
12.3911	11.4796	14.4531	14.8292	15.3023			94.6154	77.3077	139.615	96.9231	129.231
11.1704	15.2965	15.6611	14.8777	15.0646			70.3846	96.9231	139.615	121.154	125.769
14.7311	17.1404	17.2177	19.0754	14.0896			117.692	108.462	130.385	169.615	81.9231
14.2869	14.0308	22.2692	23.49	12.2781			109.615	98.0769	162.692	166.154	72.6923
14.6331	14.8973	16.9985	11.2085	11.2454			94.6154	108.462	129.231	76.1538	66.9231
13.4146	14.1923	17.6538	13.8139	21.0139			102.692	108.462	156.923	94.6154	153.462
12.5135	14.7842	16.9454	13.9212	12.435			58.8462	88.8462	154.615	87.6923	91.1538
12.1119	13.1238	14.6042	14.025	13.4469			61.1538	87.6923	123.462	101.538	111.923
19.3558	15.9911	17.5408	12.5908	16.3662			144.231	84.2308	139.615	95.7692	126.923
15.4535	17.64	14.5731	13.0085	16.9362			154.615	123.462	115.385	101.538	124.615
16.3292	13.1019	14.9077	16.2623	16.2323			96.9231	109.615	132.692	124.615	129.231
14.8604	13.0615	14.1092	18.4142	12.6485			114.231	99.2308	92.3077	101.538	79.6154
14.3481	14.2223	11.0919	15.4869	14.1392			117.692	110.769	61.1538	118.846	98.0769
12.2919	14.3896	12.9877	17.3573	16.68			79.6154	100.385	95.7692	123.462	118.846
	13.0142	14.9019	13.3304	11.9146				105	103.846	90	81.9231
	14.6873	13.5092	15.6392	15.0531				132.692	86.5385	111.923	109.615
	14.0215	10.3858	11.3781	18.66				108.462	58.8462	73.8462	124.615
	13.5231	12.2077	14.6504	12.8158				96.9231	84.2308	100.385	88.8462
	12.8677	11.4877	13.8069	18.8746				81.9231	68.0769	98.0769	153.462
	12.8054	9.66808	10.9292	14.1161				98.0769	62.3077	72.6923	101.538
	12.8689	12.3288	11.3319	18.285				85.3846	94.6154	70.3846	133.846
	13.2785	15.9011	11.1565	14.9942				105	93.4615	76.1538	136.154
	17.4819	12.5989	12.2469	9.75231				147.692	70.3846	91.1538	60
	14.2615	13.9223	12.7823	10.965				106.154	83.0769	85.3846	60
	13.335	13.5692	16.8081					81.9231	61.1538	154.615
	15.3139	23.7554	12.7742					95.7692	158.077	98.0769
	12.5077	16.2519	13.1077					90	128.077	102.692
	15.8377	16.3719	13.92					132.692	152.308	101.538
	10.3073	15.4719	12.0046					68.0769	113.077	87.6923
		14.0031	11.5096						106.154	77.3077
		18.3242	14.8177						100.385	102.692
		16.7458	12.8111						143.077	73.8462
		18.24	14.5719						130.385	85.3846
		12.6496							85.3846
		17.3585							117.692
		11.9596							87.6923
		14.7854							113.077
		10.5173							69.2308
		13.1539							106.154
		13.7642							80.7692
		14.5846							117.692
		18.8688							91.1538
		15.3427							111.923
		14.7335							102.692
		14.2131							91.1538
		12.87							84.2308
		10.3535							49.6154
		10.4285							68.0769
		15.0658							83.0769
15.1565	14.2804	14.4361	13.9226	14.6987			106.411	102.288	101.688	97.0604	109.8
