# Supplementary material for: Diverse inhibitory projections from the cerebellar interposed nucleus
Source: eLife. 2021 Sep 20;10:e66231. doi: 10.7554/eLife.66231 (PMC8483738; doi:10.7554/eLife.66231)
Supplement: Source data 1. [file elife-66231-supp5.xlsx]

## Sheet: Sheet1
	Vgat-i			Vgat-c			Ntsr1-i			Ntsr1-c			Vgat-IO-i			Vgat-IO-c			Ntsr1-RN-i			Ntsr1-RN-c			WTRetroCre-i			WTRetroCre-c
Motor	Mean	SD	N	Mean	SD	N	Mean	SD	N	Mean	SD	N	Mean	SD	N	Mean	SD	N	Mean	SD	N	Mean	SD	N	Mean	SD	N	Mean	SD	N
RN	1	0.894427	6	-1.5	0.547723	6	0	0	6	-4	0	6	1	0	5	-1.4	0.547723	5	0	0	4	-4	0	4	0	0	4	-4	0	4
VAL	0	0	6	0	0	6	0.333333	0.516398	6	-3.5	0.547723	6	0	0	5	-0.4	0.894427	5	0.25	0.5	4	-3.5	0.57735	4	0.5	0.5	4	-3.5	0.288675	4
MRN	0.5	0.83666	6	-0.5	0.547723	6	0.333333	0.816497	6	-2.83333	0.983192	6	0.6	0.547723	5	-0.2	0.447214	5	0	0	4	-3	0	4	0.25	0.25	4	-2.25	0.25	4
TRN	0.333333	0.516398	6	-1.5	0.547723	6	0	0	6	-2.83333	0.408248	6	0.4	0.547723	5	-1.4	0.547723	5	0	0	4	-3	0.816497	4	0	0	4	-3	0	4
VM	0.333333	0.816497	6	0	0	6	0	0	6	-2.16667	0.752773	6	0	0	5	0	0	5	0	0	4	-2.5	0.57735	4	0	0	4	-2.75	0.25	4
SC	0.166667	0.408248	6	0	0	6	0	0	6	-2.16667	0.752773	6	0	0	5	-0.4	0.894427	5	0	0	4	-1.5	1.29099	4	0.25	0.25	4	-2.5	0.288675	4
GRN	1.33333	1.0328	6	-0.5	0.547723	6	0.166667	0.408248	6	-2.16667	1.16904	6	1.4	0.894427	5	-0.6	0.547723	5	0.25	0.5	4	-1.75	0.5	4	0	0	4	-2.25	0.25	4
PRN	0.666667	0.516398	6	-1.33333	0.516398	6	0	0	6	-1.83333	0.752773	6	0.6	0.894427	5	-1.4	0.547723	5	0	0	4	-1.5	1	4	0.25	0.25	4	-1.75	0.478714	4
MDRNv	1	0.894427	6	-0.33333	0.516398	6	0.5	0.83666	6	-1.5	1.04881	6	1.2	0.83666	5	-0.4	0.547723	5	0.25	0.5	4	-1.25	0.957427	4	0.25	0.25	4	-1.75	0.25	4
PAG	1.33333	0.516398	6	-0.33333	0.516398	6	0.166667	0.408248	6	-1.5	1.37841	6	1	1	5	0	0	5	0.25	0.5	4	-1.25	1.5	4	0.25	0.25	4	-1.25	0.478714	4
APN	0.333333	0.816497	6	0	0	6	0	0	6	-1.5	1.22474	6	0	0	5	0	0	5	0	0	4	0	0	4	0	0	4	-1.75	0.629153	4
MARN	0.5	0.547723	6	-0.66667	0.516398	6	0	0	6	-1.33333	0.816497	6	0.6	0.894427	5	-0.6	0.894427	5	0	0	4	-1	0.816497	4	0	0	4	-1.5	0.288675	4
PG	1.66667	0.816497	6	-2.33333	0.816497	6	0	0	6	-1	0.632456	6	1.6	0.547723	5	-2.8	0.447214	5	0	0	4	-0.75	0.957427	4	0	0	4	-0.25	0.25	4
LRN	0.666667	0.516398	5	-1	0.632456	6	0.333333	0.516398	6	-0.83333	0.983192	6	0.6	0.547723	5	0	0	5	0	0	3	-0.25	0.5	3	1.5	0.5	3	0	0	3
IRN	1	0.894427	6	0	0	6	1.83333	0.983192	6	-0.66667	1.0328	6	0.2	0.447214	5	0	0	5	1.75	0.5	4	0	0	4	2.25	0.25	4	-0.25	0.25	4
SpC	0	0	6	-0.2	0.447214	6	0	0	6	-0.5	1	6	0	0	5	0	0	5	0	0	4	-1	1	4
IO	2	0	6	-4	0	6	0	0	6	-0.5	0.547723	6	2	0	5	-4	0	5	0	0	4	0	0	4	0.25	0.25	4	-2	0.408248	4
MV	1.16667	0.752773	6	-0.66667	0.816497	6	0.666667	0.516398	6	-0.33333	0.516398	6	0.8	0.447214	5	-0.2	0.447214	5	0.25	0.5	4	0	0	4	0.25	0.25	4	-0.25	0.25	4
LAV	1.66667	0.516398	6	-0.66667	0.516398	6	1.66667	0.516398	6	-0.33333	0.516398	6	1	0	5	-0.4	0.547723	5	1.5	0.57735	4	-0.5	0.57735	4	1.5	0.288675	4	-0.5	0.288675	4
SUV	2.16667	0.983192	6	-1.16667	0.752773	6	1.16667	0.408248	6	-0.33333	0.516398	6	1.2	0.447214	5	-0.8	0.447214	5	0.5	0.57735	4	0	0	4	1.25	0.478714	4	-0.25	0.25	4
Y	1.5	1.22474	6	-0.5	0.83666	6	1	1.09545	6	-0.33333	0.816497	6	0.2	0.447214	5	0	0	5	0.25	0.5	4	0	0	4	0.75	0.478714	4	0	0	4
PARN	1	1.09545	6	0	0	6	2.83333	0.983192	6	-0.16667	0.408248	6	0.2	0.447214	5	0	0	5	2.75	0.5	4	0	0	4	2.75	0.25	4	-0.25	0.25	4
SPIV	2.16667	0.983192	6	-1.33333	0.516398	6	1	0.632456	6	-0.16667	0.408248	6	1.4	0.894427	5	-0.6	0.547723	5	1.25	0.5	4	-0.25	0.5	4	1.25	0.25	4	-0.5	0.5	4
PRP	1	0.894427	6	0	0	6	0	0	6	-0.16667	0.408248	6	0	0	5	0	0	5	0	0	4	0	0	4	0.25	0.25	4	0	0	4
MDRNd	1	0.894427	6	-0.16667	0.408248	6	2.83333	0.983192	6	0	0	6	0.8	0.447214	5	0	0	5	2.5	0.57735	4	0	0	4	3	0	4	-0.25	0.25	4
SUT	0	0	6	0	0	6	0.666667	1.0328	6	0	0	6	0	0	5	0	0	5	0.5	0.57735	4	0	0	4	0.25	0.25	4	0	0	4
X	1.66667	1.36626	6	-0.5	0.547723	6	0.833333	0.983192	6	0	0	6	0.6	0.547723	5	-0.2	0.447214	5	0.25	0.5	4	0	0	4	1.25	0.478714	4	0	0	4
V	0.833333	0.752773	6	-0.5	0.83666	6	1.83333	0.983192	6	0	0	6	0	0	5	0	0	5	1	0.816497	4	0	0	4	1.25	0.25	4	0	0	4
PGRNd	1.33333	1.0328	6	-0.5	0.547723	6	0	0	6	0	0	6	1.2	0.83666	5	-0.2	0.447214	5	0	0	4	0	0	4			4			4
XII	1.16667	0.983192	6	-0.16667	0.408248	6	0	0	6	0	0	6	1.2	0.83666	5	-0.2	0.447214	5	0	0	4	0	0	4			4			4
III	1	0.894427	6	0	0	6	0	0	6	0	0	6	0.6	0.894427	5	0	0	5	0	0	4	0	0	4			4			4
VII	0.166667	0.408248	6	-0.16667	0.408248	6	0	0	6	0	0	6	0	0	5	0	0	5	0	0	4	0	0	4			4			4
MN	0	0	6	-0.5	0.547723	6	0	0	6	0	0	6	0	0	5	-0.4	0.547723	5	0	0	4	0	0	4			4			4
Mixed
ZI	0.666667	1.0328	6	-0.16667	0.408248	6	0	0	6	-2	0.894427	6	0.6	0.547723	5	0	0	5	0	0	4	-1.75	1.5	4	0	0	4	-1.25	0.629153	4
																												0		4
Sensory			6						6			6			5			5			4			4			4	0		4
PB	1.66667	1.0328	6	-1	0.632456	6	1.5	0.83666	6	0	0	6	0.6	0.547723	5	-0.6	0.547723	5	1.5	0.57735	4	0	0	4	1	0	4	0	0	4
PSV	1.66667	1.36626	6	-0.66667	0.516398	6	1.33333	0.816497	6	0	0	6	0.2	0.447214	5	0	0	5	0.25	0.5	4	0	0	4	1	0	4	0	0	4
CU	2	1.26491	6	-0.16667	0.408248	6	1	0.632456	6	-0.33333	0.816497	6	1	1	5	-0.2	0.447214	5	0.5	0.57735	4	0	0	4	0.75	0.478714	4	-0.75	0.478714	4
SPVo	1	0.894427	6	-0.16667	0.408248	6	1	0.632456	6	0	0	6	0.2	0.447214	5	0	0	5	1.25	0.957427	4	0	0	4	1.25	0.478714	4	0	0	4
NTS	1.33333	1.36626	6	-0.83333	0.983192	6	0.5	0.547723	6	-0.16667	0.408248	6	0.2	0.447214	5	-0.2	0.447214	5	0	0	4	0	0	4	0	0	4	0	0	4
SPVi	1.5	0.83666	6	-0.5	0.547723	6	0.5	0.547723	6	0	0	6	1	0.707107	5	-0.4	0.547723	5	0.25	0.5	4	0	0	4	1.25	0.478714	4	0	0	4
VPM	0.333333	0.816497	6	0	0	6	0	0	6	-1.33333	0.516398	6	0.4	0.547723	5	-0.2	0.447214	5	0	0	4	-0.75	0.957427	4	0	0	4	-2	0.408248	4
VPL	0	0	6	0	0	6	0	0	6	-0.83333	1.32916	6	0	0	5	0	0	5	0	0	4	-0.75	0.957427	4	0	0	4	-0.5	0.5	4
ECU	1.66667	1.36626	6	-0.66667	1.0328	6	0	0	6	0	0	6	0.2	0.447214	5	-0.2	0.447214	5	0	0	4	0	0	4	0.75	0.478714	4	-0.5	0.5	4
SPVc	1	0.894427	6	-0.5	0.547723	6	0	0	6	0	0	6	0.6	0.547723	5	0	0	5	0	0	4	0	0	4	0	0	4	0	0	4
																												0		4
Modulatory																												0		4
VTA	0	0	6	-0.33333	0.516398		0	0	6	-2.33333	0.516398	6	0	0	5	0	0	5	0	0	4	-1.25	1.5	4	0	0	4	-2.5	0.288675	4
PF	0	0	6	-0.16667	0.408248	6	0	0	6	-2	1.09545	6	0	0	5	0	0	5	0	0	4	-1.75	0.5	4	0	0	4	-2	0.408248	4
CM/PCN	0	0	6	0	0	6	1	0.894427	6	-1.66667	0.816497	6	0	0	5	0	0	5	0.5	0.57735	4	-1.75	0.5	4	0.25	0.25	4	-2	0	4
MD	0	0	6	0	0	6	0	0	6	-1.5	1.04881	6	0	0	5	0	0	5	0	0	4	-0.75	0.957427	4	0	0	4	-1.75	0.629153	4
PO	0	0	6	0	0	6	0	0	6	-1.5	1.37841	6	0	0	5	0	0	5	0	0	4	-0.75	0.957427	4	0	0	4	-0.75	0.478714	4
RM	0	0	6	0	0	6	0	0	6	-1.16667	1.32916	6	0	0	5	0	0	5	0	0	4	-0.75	0.957427	4	0	0	4	-0.75	0.478714	4
PPN	0	0	6	-0.33333	0.516398	6	0	0	6	-0.5	0.547723	6	0	0	5	0	0	5	0	0	4	0	0	4	0.25	0.25	4	-0.25	0.25	4
						6
Cb-Ctx
2	0.833333	0.752773		0	0		0	0					0	0		0		5	0	0	4				0	0	4			4
3	1.16667	0.983192	6	0	0		1	0.894427	6				0	0	5	0		5	0.25	0.5	4				0.5	0.5	4			4
4/5	1	1.09545	6	-0.5	0.547723	6	2.66667	0.516398	6				0.2	0.447214	5	0		5	1.25	0.957427	4				2.5	0.288675	4			4
6	0.666667	0.516398	6	-0.16667	0.408248	6	1.16667	1.32916	6				0	0	5	0		5	0.5	0.57735	4				1.25	0.478714	4			4
7	0.5	0.547723	6	0	0	6	0	0	6				0	0	5	0		5	0	0	4				0.25	0.25	4			4
8	1.33333	1.0328	6	-0.83333	0.752773	6	0.833333	0.983192	6				0	0	5	0		5	0	0	4				0.5	0.5	4			4
9	2.16667	1.32916	6	-1	1.09545	6	0	0	6				0.2	0.447214	5	0		5	0	0	4				0.75	0.478714	4			4
10	0.5	0.83666	6	-0.16667	0.408248	6	0	0	6				0	0	5	0		5	0	0	4				0	0	4			4
Fl	1.83333	1.47196	6	0	0	6	0	0	6				0	0	5	0		5	0	0	4				0	0	4			4
PFl	1.66667	1.36626	6	0	0	6	0.833333	1.32916	6				0.6	0.547723	5	0		5	0.5	0.57735	4				0	0	4			4
PM	1.16667	0.983192	6	-0.33333	0.516398	6	2	0.894427	6				0	0	5	0		5	0.75	0.957427	4				2	0.408248	4			4
Cop	1	0.894427	6	-0.66667	0.816497	6	2	0.632456	6				0.2	0.447214	5	0		5	1.25	0.957427	4				2.25	0.478714	4			4
Cr1	0.833333	0.752773	6	0	0	6	1	0.894427	6				0	0	5	0		5	0.5	0.57735	4				0.5	0.5	4			4
Cr2	1.16667	0.983192	6	-0.16667	0.408248	6	1.83333	1.16904	6				0.2	0.447214	5	0		5	1.25	0.957427	4				1.75	0.25	4			4
Sim	0.666667	0.816497	6	0	0	6	2.66667	0.516398	6				0	0	5	0		5	1.75	0.5	4				2.5	0.288675	4			4
