# Supplementary material for: Diverse inhibitory projections from the cerebellar interposed nucleus
Source: eLife. 2021 Sep 20;10:e66231. doi: 10.7554/eLife.66231 (PMC8483738; doi:10.7554/eLife.66231)
Supplement: Source data 2. [file elife-66231-supp6.xlsx]

## Sheet: Sheet1
Ntsr1 animal 1				Ntsr1 animal 2					Vgat animal 1				Vgat animal 2				Gad1 animal 1/1				Vglut2 animal 1/1
cell #	Vglut2	Vgat		cell #	Vglut2	Vgat			cell #	Vglut2	Vgat		cell #	Vglut2	Vgat		cell #	Vglut2	Vgat		cell #	Vglut2	Vgat
1	1			1	1				1		1		1		1		1		1		1	1
2	1			2	1				2		1		2		1		2		1		2	1
3	1			3	1				3	0	0		3		1		3		1		3	1
4	1			4	not a cell				4		1		4		1		4		1		4	1
5	1			5	1				5		1		5		1		5		1		5	1
6		1		6	1				6		1		6		1		6	1			6	1
7	1			7	1				7		1		7		1		7		1		7	1
8	1			8	not a cell				8		1		8	0	0		8		1		8	1
9	1			9	1				9		1		9		1		9		1		9	1
10		1		10	1				10		1		10		1		10		1		10	1
11	1			11	1				11		1		11		1		11		1		11	1
12	1			12	1				12		1		12		1		12		1		12	1
13	1			13		1			13		1		13		1		13		1		13	1
14	1			14		1			14		1		14		1		14		1		14	1
15	1			15	1				15		1		15		1		15		1		15	1
16	1			16		1			16		1		16	0	0		16		1		16	1
17	1			17	1				17		1		17		1		17	0	0		17	1
18	1			18		1			18	0	0		18		1		18		1		18	1
19	1			19	1				19		1		19		1		19	0	0		19	1
20	1			20	1				20	0	0		20		1		20		1		20	1
21	1			21		1			21		1		21		1		21		1		21	1
22	1			22	1				22		1		22		1		22	0	0		22	1
23	1			23	1				23	0	0		23		1		23		1		23	1
24	1			24	1				24		1		24		1		24		1		24	1
25	1			25	1				25		1		25		1		25		1		25	1
26	1			26	1				26	0	0		26		1		26		1		26	1
27	1			27	1				27	0	0		27		1		27		1		27	1
28		1							28		1		28	1			28		1		28	1
29	1	1							29		1		29		1		29		1		29	1
30	1								30	0	0		30		1		30		1		30	1
31	1								31		1		31		1		31		1		31	1
32		1							32	0	0		32		1		32	1			32	1
33	1								33		1		33		1		33	1			33	1
34	1								34		1		34		1		34		1		34	1
									35		1		35		1		35	1			35	1
Ntsr1 animal 1 section2				Ntsr1 animal 2 section2					36		1		36		1		36		1		36	1
Cell #	Vglut2	Vgat		Cell #	Vglut2	Vgat			37		1		37		1		37	1			37	1
1	1			1	1				38		1		38	0	0		38		1		38	1
2	1			2	1				39		1		39		1		39	1			39	1
3	1			3	1				40		1		40		1		40	1			40	1
4	1			4	1				41		1	total analyzed	37			total	37				41	1
5	1			5	1				42		1										42	1
6	1			6	1				43		1		Vgat animal 2, section 2				Gad1, section 2				43	1
7	1			7	1				44		1		cell #	Vglut2	Vgat		cell #	Vglut2	Vgat		44	1
8	1			8	1				45	0	0		1		1		1		1		45	1
9	1			9	1				46		1		2		1		2		1		46	1
10	1			10	1				47		1		3		1		3		1		47	1
11		1		11		1			48	0	0		4		1		4		1		48	1
12	1			12	1				49		1		5		1		5		1		49	1
13	1			13	1				50		1		6		1		6		1		50	1
14	1			14	1				51		1		7		1		7		1		51	1
15	1			15	1				52		1		8		1		8		1		52	1
16	1			16	1				53		1		9		1		9		1		53	1
17	1			17	not a cell				54		1		10		1		10		1		54	1
18	1			18	0	0			55		1		11		1		11		1		55	1
19	1	1		19	1				56		1		12		1		12	0	0		56	1
20	1			20	1				57		1		13		1		13		1		57	1
21	1								58	not a new cell			14		1		14		1		58	1
22	1								59		1		15		1		15	0	0		59	1
23	1								60		1		16		1		16		1		60	1
24	1								61		1		17		1		17		1		61	1
25	1								62		1		18		1		18		1		62	1
26	1								63		1		19		1		19	0	0		63	1
27	1								64		1		20		1		20		1		64	1	1
28	1								65		1		21		1		21	1			65	1
29	1								66		1		22		1		22		1		66	1
30	1								67		1		23		1		23		1		67	1
31	1								68		1		24		1		24	0	0		68	1
32	1								69		1		25		1		25		1		69	1
33	1								70		1		26		1		26		1		70	1
34	1								71		1		27		1		27		1		71	1
35	1								72		1		28		1		28		1		72	1
36	1								73		1		29		1		29		1		73	1
37	1								74		1		30		1		30		1		74	1
38	1								75		1		31		1		31		1		75	1
39	1								76		1		32		1		32		1		76	1
40	1								77		1		33		1		33		1		77	1
41	1								78		1		34		1		34		1		78	1
42	1								79		1		35		1		35		1		79	1
43	1								80	0	0						36	1			80	1
44	1								81	0	0			1	71	72					81	1
45	1								82	0	0						32	9	60		82	1
46	1								83		1										83	1
47	1								84		1						69				84	1
48	1								85		1										85	1
49	1								total anaylzed												86	1
50	1								71												87	1
51	1																				88	1
52	1								Vgat animal 1, section 2												89		1
53		1							cell #	Vglut2	Vgat										90	1
54	1								1		1										91	1
55		1							2		1										92	1
									3		1										93	1
									4		1										94	1
totals	82	9	89		37	6	43		5		1										95	1
									6		1										96	1
									7		1
									8		1										Vglut2 animal 1/1
									9		1										cell #	Vglut2	Vgat
									10		1										1	1
									11		1										2	1
									12		1										3	1
									13		1										4	0	0
									14	0	0										5	1
									15		1										6	1
									16		1										7	1
									17		1										8	1
									18		1										9	1
									19		1										10	1
									20		1										11	1
									21		1										12	1
									22		1										13	1
									23		1										14	1
									24		1										15	1
									25		1										16	1
									26		1										17	1
									27		1										18	1
									28		1										19	1
									29		1										20	1
									30		1										21	1
									31		1										22	1
									32	0	0										23	1
									33		1										24	1
									34		1										25	1
									35		1										26	1
									36		1										27	1
									37		1										28	1
									38		1										29	1
									39		1										30	1
									40		1										31	1
									41		1										32	1
									42		1										33	1
									43		1										34	1
									44		1										35	1
									45		1										36	1
									46		1										37	1
									47		1										38	1
									48		1										39	1
									49	1											40	1
									50		1										41	1
									51	1											42	1
									52	1											43	1
									53		1										44	1
									54		1										45	1
									55		1										46	1
									56		1										47	1
									57		1										48	1
									58		1										49	1
									59		1										50	1
									60		1										51	1
									61		1										52	1
									62		1										53	1
									63		1										54	1
									64		1										55	1
									65		1										56	1
									66		1										57	1
									67	0	0										58	1
									68		1										59	1
									69		1										60	1
									70		1										61	1
									71		1										62	1	1
									72		1										63	1
									73		1										64	1
									74		1										65	1
									75	0	0										66	1
									76		1										67	1
									77		1										68	1
									78		1										69	1
									79		1										70	1
									80		1										71	1
									81		1										72	1
									82		1										73	1
									83		1										74	1
									84		1										75	1
									85		1										76	1
									86		1										77	1
									87		1										78	1
									88		1										79	1
									89		1										80	1
									90		1										81	1
									91		1										82	1
									92		1										83	1
									93		1										84	1
									94		1
									95		1										83
																						178	3	179
									91
										3	159	162
