# Supplementary material for: Diverse inhibitory projections from the cerebellar interposed nucleus
Source: eLife. 2021 Sep 20;10:e66231. doi: 10.7554/eLife.66231 (PMC8483738; doi:10.7554/eLife.66231)
Supplement: Source data 3. [file elife-66231-supp7.xlsx]

## Sheet: S11 Source Data
	Vgat Ipsi			Vgat Contra			Vglut2 ipsi			Vglut2 contra
Motor	Mean	SD	N	Mean	SD	N	Mean	SD	N	Mean	SD	N
IN	0.0511859	0.0282493	3	-0.0020997	0.0004589	3	0.116645	0.0412087	3	-0.0049773	0.0027054	3
TRN	0.0431214	0.0204066	3	-0.0616415	0.0293346	3	0.0326707	0.00331391	3	-0.0292719	0.00869092	3
SUV	0.0372094	0.0159532	3	-0.0073309	0.00103783	3	0.0454259	0.0135602	3	-0.0068024	0.00340171	3
MV	0.0343075	0.00561418	3	-0.0401325	0.010354	3	0.0399178	0.00459402	3	-0.0331957	0.0178924	3
PRN	0.0248642	0.0105711	3	-0.0156037	0.00725685	3	0.03539	0.00685827	3	-0.0200324	0.0131427	3
PAG	0.0215481	0.00600541	3	-0.0047602	0.00085041	3	0.0077738	0.00592222	3	-0.0055836	0.00228485	3
V	0.0195436	0.00908928	3	-0.002833	0.00046765	3	0.0118402	0.00688614	3	-0.0009094	0.00090937	3
LN	0.0181969	0.00761929	3	-5.27e-05	5.269e-05	3	0.0462605	0.0123595	3	-0.0003031	0.00030312	3
SPIV	0.0178164	0.00136763	3	-0.0366969	0.00704596	3	0.0343892	0.0157338	3	-0.0160219	0.00976749	3
MRN	0.0170341	0.00713473	3	-0.0063669	0.00137703	3	0.0149183	0.00756416	3	-0.0083332	0.00193965	3
GRN	0.0167338	0.00283797	3	-0.0171708	0.00335182	3	0.0173306	0.00486534	3	-0.0119213	0.00616557	3
IRN	0.0149354	0.0037307	3	-0.026121	0.00227591	3	0.0191597	0.010041	3	-0.0114376	0.00255021	3
Intrstl	0.0148201	0.00431438	3	-0.0014228	0.00032925	3	0.0236113	0.00951845	3	-0.0002021	0.00020208	3
PARN	0.0103885	0.00492476	3	-0.0090979	0.00282189	3	0.0153201	0.00766663	3	-0.0026207	0.00131037	3
LRN	0.00915364	0.00139428	3	-0.0502377	0.00784128	3	0.00242498	0.00242498	3	-0.0011114	0.00111145	3
LAV	0.00869105	0.00265085	3	-0.0060942	0.00122935	3	0.014585	0.00476954	3	-0.0064261	0.00196722	3
PCG	0.00835329	0.00214658	3	-0.0012644	0.00039763	3	0.00608876	0.00200828	3	-0.0003031	0.00030312	3
PG	0.00761382	0.00390219	3	-0.0165567	0.00543093	3	0.0140266	0.00909577	3	-0.0054825	0.00234931	3
MN	0.00679828	0.00225051	3	-0.0262255	0.00306803	3	0.0296537	0.00792342	3	-0.0276608	0.00880479	3
IO	0.00498538	0.00144029	3	-0.000596	0.00042691	3	0.00010104	0.00010104	3	-0.0003031	0.00030312	3
PRP	0.00496235	0.00156402	3	-0.0076226	0.00314315	3	0.0084517	0.00606056	3	-0.0099673	0.00583335	3
XII	0.00433737	0.00156142	3	-0.0042925	0.00117916	3	0.00239079	0.00146414	3	-0.0006062	0.00060624	3
MDRNv	0.00383533	0.00221469	3	-0.0060951	0.00231637	3	0.00101041	0.00101041	3	-0.0026939	0.00146768	3
SC	0.00328132	0.00115583	3	-0.0066709	0.00230516	3	0.00852891	0.00357915	3	-0.0157013	0.00259419	3
Y	0.00321988	0.00116319	3	-0.0014286	0.00045488	3	0.0118442	0.00782511	3	0	0	3
MARN	0.00282571	0.00104921	3	-0.0021889	0.00018293	3	0.00171769	0.00171769	3	-0.0002021	0.00020208	3
RR	0.00271556	0.00135327	3	-0.0009385	0.00028783	3	0.00090937	0.00090937	3	0	0	3
PGRN i	0.00252959	0.00167287	3	-0.003049	0.0014718	3	0.00111145	0.00111145	3	-0.0022897	0.00147685	3
PGRN d	0.0021483	0.00035314	3	-0.0034348	0.00067111	3	0.00228975	0.00147685	3	-0.002997	0.00153239	3
SNC	0.00194565	0.00069355	3	-0.0002108	0.00021077	3	0.0005052	0.0005052	3	0	0	3
SUT	0.00194159	0.00116742	3	-0.0007335	0.00036675	3	0.00311958	0.00240196	3	-0.0002021	0.00020208	3
MDRNd	0.00190505	0.00094443	3	-0.0082027	0.0049465	3	0.00639189	0.00188833	3	-0.0022897	0.00147685	3
X	0.00180981	0.00035196	3	-0.0014451	0.00017715	3	0.00101041	0.00101041	3	-0.000101	0.00010104	3
EW	0.0014896	0.00019189	3	-0.0011713	0.00015059	3	0.00020208	0.00020208	3	-0.000101	0.00010104	3
RN	0.00055552	0.00043962	3	-0.0118119	0.00265372	3	0.00020208	0.00020208	3	-0.0049105	0.00053511	3
CUN	0.00054316	0.00012762	3	-0.0002635	0.00026346	3	0.00030312	0.00030312	3	-0.000101	0.00010104	3
SNR	0.00043972	0.00010832	3	-5.27e-05	5.269e-05	3	0.00020208	0.00020208	3	-0.0016835	0.0016835	3
III	0.00042154	0.00042154	3	-0.0002636	0.00013948	3	0	0	3	0	0	3
STN	0.00030406	0.00010207	3	0	0	3	0.00010104	0.00010104	3	-0.000101	0.00010104	3
NPC	0.00028985	0.00018442	3	-0.0001318	6.974e-05	3	0.00010104	0.00010104	3	-0.000101	0.00010104	3
VII	0.00021086	0.00013949	3	-0.0001054	0.00010539	3	0	0	3	-0.000101	0.00010104	3
VI	0.00010539	0.00010539	3	-5.27e-05	5.269e-05	3	0	0	3	0	0	3
OP	5.269e-05	5.269e-05	3	0	0	3	0	0	3	0	0	3
APN	0	0	3	0	0	3	0.00130719	0.00130719	3	0	0	3
PPY	0	0	3	-0.0001337	7.122e-05	3	0.00010104	0.00010104	3	0	0	3
MOp	0	0	3	-4.05e-05	4.051e-05	3	0	0	3	-0.000101	0.00010104	3
Mixed
ZI	0.00232853	0.00023455		-0.0001864	9.556e-05	3	0.00111145	0.00111145	3	-0.0018856	0.00159211	3
Sensory
PB	0.041298	0.0185254	3	-0.0023668	0.00074594	3	0.0484659	0.0194015	3	-0.0037258	0.00227256	3
PSV	0.0204286	0.00404178	3	-0.0027274	0.00107582	3	0.0103373	0.0076407	3	-0.0003031	0.00030312	3
SPVo	0.00527983	0.00059648	3	-0.0006891	0.0001366	3	0.00844055	0.00215055	3	-0.0020877	0.00152221	3
SPVi	0.00451583	0.0011896	3	-0.014164	0.00312066	3	0.0146924	0.00530317	3	-0.0062845	0.00276548	3
CU	0.00264671	0.00020101	3	-0.0073815	0.00082876	3	0.0138889	0.00321235	3	-0.0060609	0.00462876	3
SPVc	0.00155862	0.00075016	3	-0.0059021	0.00165738	3	0.003328	0.00177506	3	-0.000101	0.00010104	3
NTS	0.00155024	0.00091861	3	-0.0021665	0.00144601	3	0.00606091	0.00462876	3	-0.0067619	0.0042671	3
ECU	0.00146126	0.00011436	3	-0.0128447	0.00296524	3	0.00528678	0.00292547	3	-0.006835	0.00668406	3
DCO	0.00136797	0.00011495	3	-0.0002147	0.00014317	3	0.00198662	0.00155427	3	-0.000101	0.00010104	3
POR	0.00101731	0.00084161	3	-0.0008431	0.00084308	3	0.00020208	0.00020208	3	-0.000101	0.00010104	3
IC	0.00076806	0.00041266	3	-0.0003831	0.00020639	3	0.00171135	0.00115921	3	-0.0015093	0.00121878	3
NLL	0.00052693	0.00052693	3	-0.0002108	0.00021077	3	0.00070729	0.00070729	3	-0.0030185	0.00243756	3
VCO	0.00047626	0.00023611	3	-9.32e-05	4.778e-05	3	0.00010104	0.00010104	3	0	0	3
SSp	0.00036267	0.00025347	3	-8.1e-05	8.102e-05	3	0.00010104	0.00010104	3	-0.000101	0.00010104	3
Gr	7.908e-05	7.908e-05	3	-5.27e-05	5.269e-05	3	0.00228975	0.00147685	3	-0.0003031	0.00030312	3
AUDp	7.908e-05	7.908e-05	3	0	0	3	0	0	3	-0.000101	0.00010104	3
AIP	4.051e-05	4.051e-05	3	0	0	3	0	0	3	0	0	3
SSs	0	0	3	0	0	3	0	0	3	-0.000101	0.00010104	3
MEV	0	0	3	0	0	3	0.00111145	0.00111145	3	-0.0010104	0.00101041	3
Modulatory/ affective
CEA	0.00641948	0.00228792	3	-0.0001054	0.00010539	3	0.00070729	0.00070729	3	0	0	3
RM	0.00544745	0.00204637	3	-0.0026427	0.00045826	3	0.00369798	0.00085279	3	-0.0006062	0.00060624	3
LHA	0.00366455	0.00083256	3	-0.0003728	0.00019113	3	0.00161665	0.00161665	3	-0.0002021	0.00020208	3
DR	0.00359915	0.0007307	3	-0.0012645	0.00018215	3	0.00040416	0.00040416	3	-0.0014082	0.00125971	3
CS	0.00349905	0.00168076	3	-0.0032013	0.001601	3	0.00080833	0.00080833	3	0	0	3
VTA	0.00229835	0.00123832	3	-0.0012162	0.00037619	3	0.0023176	0.00118696	3	-0.0047752	0.00286043	3
LC	0.00167371	0.0009584	3	-0.0001723	3.415e-05	3	0.00090937	0.00090937	3	-0.000101	0.00010104	3
PPN	0.0015851	0.0005662	3	-0.0002796	0.00014334	3	0.00080833	0.00080833	3	-0.0017114	0.00115921	3
RPO	0.00051677	0.00021895	3	-0.0005291	0.00032947	3	0	0	3	0	0	3
NI	0.00050071	0.00025138	3	0	0	3	0	0	3	0	0	3
SLC	0.00048844	0.00031085	3	-7.91e-05	7.908e-05	3	0	0	3	0	0	3
SLD	0.00033045	0.00019094	3	-4.05e-05	4.051e-05	3	0.00201447	0.00113333	3	-0.0002021	0.00020208	3
RL	0.00026346	0.00026346	3	-5.27e-05	5.269e-05	3	0.00020208	0.00020208	3	0	0	3
RO	0.00025128	0.00019372	3	-0.0001864	9.556e-05	3	0	0	3	-0.000101	0.00010104	3
PH	0.00023725	0.00023725	3	-7.91e-05	7.908e-05	3	0.00010104	0.00010104	3	-0.0002021	0.00020208	3
ARH	0.00015817	0.00015817	3	0	0	3	0	0	3	0	0	3
PVI	0.00015817	0.00015817	3	0	0	3	0	0	3	0	0	3
BA	0.00015817	0.00015817	3	0	0	3	0	0	3	0	0	3
CLI	0.00015808	0.00015808	3	-0.0001581	0.00015808	3	0	0	3	0	0	3
SBPV	7.908e-05	7.908e-05	3	0	0	3	0	0	3	0	0	3
MM	4.051e-05	4.051e-05	3	-5.27e-05	5.269e-05	3	0.00010104	0.00010104	3	0	0	3
LGd	0	0	3	-5.27e-05	5.269e-05	3	0	0	3	0	0	3
PO	0	0	3	-7.91e-05	7.908e-05	3	0	0	3	-0.000101	0.00010104	3
IPN	0	0	3	0	0	3	0.00020208	0.00020208	3	0	0	3

## Sheet: Location of Starter Cells
	Vglut2				Vgat
	Mean	SEM	N		Mean	SEM	N
IN	0.649015	0.0932344	3		0.625457	0.0565568	3
icgs	0.0801935	0.0283369	3		0.182385	0.0594974	3
LN	0.152667	0.0585407	3		0.05019	0.0313419	3
SUV	0.0503005	0.0305718	3		0.0741607	0.028389	3
MN	0.0225228	0.0130911	3		0.0537479	0.0179996	3
PB	0.0259259	0.0259259	3		0.0140597	0.012248	3
Y	0.0114193	0.0075042	3		0	0	3
LAV	0.00795545	0.00795545	3		0	0	3
